1 **Proteomics of autophagy deficient macrophages reveals enhanced**  
2 **antimicrobial immunity via the oxidative stress response**

3

4 Timurs Maculins<sup>1,6</sup>, Erik Verschueren<sup>2</sup>, Trent Hinkle<sup>2</sup>, Patrick Chang<sup>3</sup>, Cecile  
5 Chalouni<sup>3</sup>, Junghyun Lim<sup>1</sup>, Anand Kumar Katakam<sup>3</sup>, Ryan C. Kunz<sup>7</sup>, Brian K.  
6 Erickson<sup>7</sup>, Ting Huang<sup>8</sup>, Meena Choi<sup>8</sup>, Tsung-Heng Tsai<sup>8,9</sup>, Olga Vitek<sup>8</sup>, Mike  
7 Reichelt<sup>3</sup>, John Rohde<sup>4</sup>, Ivan Dikic<sup>5,6\*</sup>, Donald S. Kirkpatrick<sup>2\*</sup>, Aditya Murthy<sup>1\*</sup>.

8

9 **Affiliations**

10 <sup>1</sup>Department of Cancer Immunology, Genentech, South San Francisco, CA, USA.

11 <sup>2</sup>Department of Microchemistry, Proteomics and Lipidomics, Genentech, South San  
12 Francisco, CA, USA.

13 <sup>3</sup>Department of Pathology, Genentech, South San Francisco, CA, USA.

14 <sup>4</sup>Department of Microbiology and Immunology, Dalhousie University, Canada.

15 <sup>5</sup>Department of Infectious Diseases, Genentech, South San Francisco, CA, USA.

16 <sup>6</sup>Institute of Biochemistry II, Goethe University, Frankfurt am Main, Germany.

17 <sup>7</sup>IQ Proteomics LLC, Cambridge, MA, USA.

18 <sup>8</sup>Khoury College of Computer Sciences, Northeastern University, Boston, MA, USA.

19 <sup>9</sup>Department of Mathematical Sciences, Kent State University, Kent, OH, USA.

20

21 \*These authors jointly supervised this work.

22

23 **Correspondence**

24 Aditya Murthy: [murthy.aditya@gene.com](mailto:murthy.aditya@gene.com)

25 Donald Kirkpatrick: [kirkpatrick.donald@gene.com](mailto:kirkpatrick.donald@gene.com)

26 Ivan Dikic: [dikic@biochem2.uni-frankfurt.de](mailto:dikic@biochem2.uni-frankfurt.de)

27

28

29 **Impact statement**

30 Maculins *et al* utilize multiplexed mass spectrometry to show that loss of the  
31 autophagy gene *Atg16l1* in macrophages enhances antimicrobial immunity against  
32 intracellular pathogens via the oxidative stress response.

## 33 **Abstract**

34 Defective autophagy is associated with chronic inflammation. Loss-of-function  
35 of the core autophagy gene *Atg16l1* increases risk for Crohn's disease by enhancing  
36 innate immunity in macrophages. However, autophagy also mediates clearance of  
37 intracellular pathogens. These divergent observations prompted a re-evaluation of  
38 ATG16L1 in antimicrobial immunity. In this study, we found that loss of *Atg16l1* in  
39 macrophages enhanced the killing of virulent *Shigella flexneri* (*S.flexneri*), an enteric  
40 bacterium that resides within the cytosol by escaping all membrane-bound  
41 compartments. Quantitative multiplexed proteomics revealed that ATG16L1  
42 deficiency significantly upregulated proteins involved in the glutathione-mediated  
43 antioxidant response to compensate for elevated oxidative stress, which also  
44 promoted *S.flexneri* killing. Consistently, myeloid cell-specific deletion of *Atg16l1*  
45 accelerated bacterial clearance *in vivo*. Finally, pharmacological modulation of  
46 oxidative stress by suppression of cysteine import conferred enhanced microbicidal  
47 properties to wild type macrophages. These findings demonstrate that control of  
48 oxidative stress by ATG16L1 regulates antimicrobial immunity against intracellular  
49 pathogens.

50

## 51 **Introduction**

52 Effective immunity against enteric pathogens requires complex signaling to  
53 coordinate the inflammatory response, pathogen clearance, tissue remodeling and  
54 repair (Maloy and Powrie, 2011). Autophagy, a cellular catabolic pathway that  
55 eliminates cytosolic cargo via lysosomal degradation, has emerged as an important  
56 regulator of mucosal immunity and inflammatory bowel disease (IBD) etiology.  
57 Genome-wide association studies linked a missense variant (T300A) in the core  
58 autophagy gene *Atg16l1* with increased risk for inflammatory bowel diseases (Hampe  
59 et al., 2007; Rioux et al., 2007). Later studies demonstrated that this variant  
60 contributes to enhanced caspase-mediated degradation of the ATG16L1 protein  
61 (Lassen et al., 2014; Murthy et al., 2014). Genetic loss-of-function of core autophagy  
62 genes including *Atg16l1* increases secretion of pro-inflammatory cytokines by  
63 macrophages in response to toll-like receptor (TLR) activation (Lim et al., 2019;  
64 Saitoh et al., 2008). This contributes to increased mucosal inflammation, driving  
65 resistance to extracellular pathogens such as *Citrobacter rodentium* (Marchiando et  
66 al., 2013; Martin et al., 2018) and pathogenic *Escherichia coli* (Wang et al., 2019).

67 Defective autophagy in the myeloid compartment also confers enhanced  
68 antimicrobial immunity against certain intracellular pathogens, such as *Salmonella*  
69 *typhimurium* (*S.typhimurium*) and *Listeria monocytogenes* via induction of type I and  
70 II interferon responses (Samie et al., 2018; Wang et al., 2020). Thus, autophagy acts  
71 as an immuno-suppressive pathway in antimicrobial immunity *in vivo*.

72 Targeted elimination of intracellular pathogens by xenophagy, a form of  
73 selective autophagy, is well-described in cellular model systems (Bauckman et al.,  
74 2015). In contrast to non-selective autophagy triggered by nutrient stress, xenophagy  
75 functions to eliminate intracellular bacteria by sequestering them in autophagosomes  
76 and shuttling them to the degradative lysosomal compartment. Pathogenic bacteria  
77 have evolved mechanisms to either evade capture by the autophagy machinery, as  
78 by *S.typhimurium* and *Shigella flexneri* (*S.flexneri*) (Birmingham et al., 2006;  
79 Campbell-Valois et al., 2015; Dong et al., 2012; Martin et al., 2018; Xu et al., 2019b)  
80 or attenuate autophagic flux as by *Legionella pneumophila* (Choy et al., 2012).  
81 *S.typhimurium* primarily resides in a protective compartment known as the  
82 *Salmonella* containing vacuole (SCV). There it prevents formation of the ATG5-  
83 ATG12-ATG16L1 complex at the bacterial vacuolar membrane via secretion of the  
84 effector SopF, which blocks ATG16L1 association with vacuolar ATPases (Xu et al.,  
85 2019b). Despite its ability to interfere with autophagy, infected host cells still  
86 recognize 10-20% of cytosolic *S.typhimurium* and subject this sub-population to  
87 lysosomal degradation via mechanisms involving direct recognition of either the  
88 bacterial surface (Huang and Brumell, 2014; Stolz et al., 2014) or damaged  
89 phagocytic membranes (Fujita et al., 2013; Thurston et al., 2012).

90 Compared to *S.typhimurium*, *S.flexneri* is not characterized by a vacuolar life  
91 cycle, but instead resides in the host cytoplasm. *S.flexneri* effector proteins IcsB and  
92 VirA are capable of completely inhibiting autophagic recognition to permit replication  
93 in the host cytosol (Liu et al., 2018; Ogawa et al., 2005). In response, the host cell  
94 attempts to further counteract *S.flexneri* infection via diverse mechanisms, such as  
95 coating bacterial cell surfaces with guanylate-binding proteins (GBPs) (Li et al., 2017;  
96 Wandel et al., 2017) or sequestering bacteria in septin cage-like structures to restrict  
97 their motility (Mostowy et al., 2010). To reveal these mechanisms, cell-based studies  
98 have largely utilized attenuated variants (e.g. IcsB or IcsB/VirA double mutants of  
99 *S.flexneri*) or strains that inefficiently colonize the host cytosol (e.g. *S.typhimurium*  
100 which express SopF). Thus, observations from *in vivo* genetic models must be

101 reconciled with observations made in cell-based systems to fully describe the roles of  
102 autophagy in antimicrobial immunity. Importantly, there is a lack of understanding of  
103 how autophagy contributes to immunity against non-attenuated (wild type) cytosolic  
104 pathogens. This insight is especially lacking in relevant cell types, such as  
105 macrophages that constitute a physiologically relevant niche for the expansion of  
106 *S.flexneri* (Ashida et al., 2015).

107 In this study we investigated the role of macrophage ATG16L1 in response to  
108 infection by wild type *S.flexneri* (strain M90T). Surprisingly, we observed that loss of  
109 *Atg16l1* in BMDMs enhanced *S.flexneri* elimination in culture, as well as by mice  
110 lacking ATG16L1 in the myeloid compartment *in vivo* (*Atg16l1-cKO*). We utilized  
111 multiplexed quantitative proteomics to characterize total protein, phosphorylation and  
112 ubiquitination changes in wild type (WT) and ATG16L1-deficient (cKO) bone marrow-  
113 derived macrophages (BMDMs) either uninfected or infected with *S.flexneri*.  
114 Quantifying global protein levels along with site-specific post-translational  
115 modifications (PTMs) provided a comprehensive catalogue of basal differences  
116 between WT and cKO BMDMs and the dynamic response of each to infection. As  
117 expected, profound differences were observed for components in the autophagy  
118 pathway, as well as proteins involved in cell death, innate immune sensing and NF-  
119  $\kappa$ B signaling. Interestingly, a cluster of proteins emerging from the proteomics data  
120 implicated the basal oxidative stress response as a key difference between control  
121 and ATG16L1-deficient BMDMs. In particular, significant accumulation of the  
122 SLC7A11 subunit of a sodium-independent cystine-glutamate antiporter (XCT),  
123 critical for the generation of glutathione (GSH) used in detoxification of ROS and lipid  
124 peroxides, was noteworthy in cKO cells. This coincided with basal elevation of  
125 cytosolic ROS in cKO BMDMs, thus providing an explanation for the sustained  
126 viability and antimicrobial capacity of ATG16L1-deficient macrophages. Furthermore,  
127 increased cytosolic ROS caused by pharmacological XCT inhibition enhanced  
128 *S.flexneri* clearance by WT BMDMs, recapitulating cKO phenotypes. Taken  
129 together, this study offers a comprehensive, multidimensional catalogue of proteome-  
130 wide changes in macrophages following infection by an enteric cytosolic pathogen,  
131 including key nodes of cell-autonomous immunity regulated by autophagy. Our  
132 findings demonstrate that ATG16L1 tunes antimicrobial immunity against cytosolic  
133 pathogens via the oxidative stress response, and that pharmacological modulation of

134 this pathway represents a novel strategy towards enhanced elimination of cytosolic  
135 pathogens.

136

## 137 Results

### 138 Enhanced clearance of intracellular *S.flexneri* by loss of *Atg16l1*.

139 Recent studies have identified that defective autophagy in macrophages  
140 enhances multiple inflammatory signaling responses to promote antimicrobial  
141 immunity (Lim et al., 2019; Martin et al., 2018; Samie et al., 2018; Wang et al., 2020).  
142 Given these observations, we wanted to explore whether loss of *Atg16l1* affects  
143 killing of the wild type, invasive, intracellular pathogen *Shigella flexneri* strain M90T  
144 (*S.flexneri*). To test this, bone marrow-derived macrophages (BMDMs) from either

**Figure 1. Enhanced clearance of intracellular *S.flexneri* by loss of *Atg16l1*.**

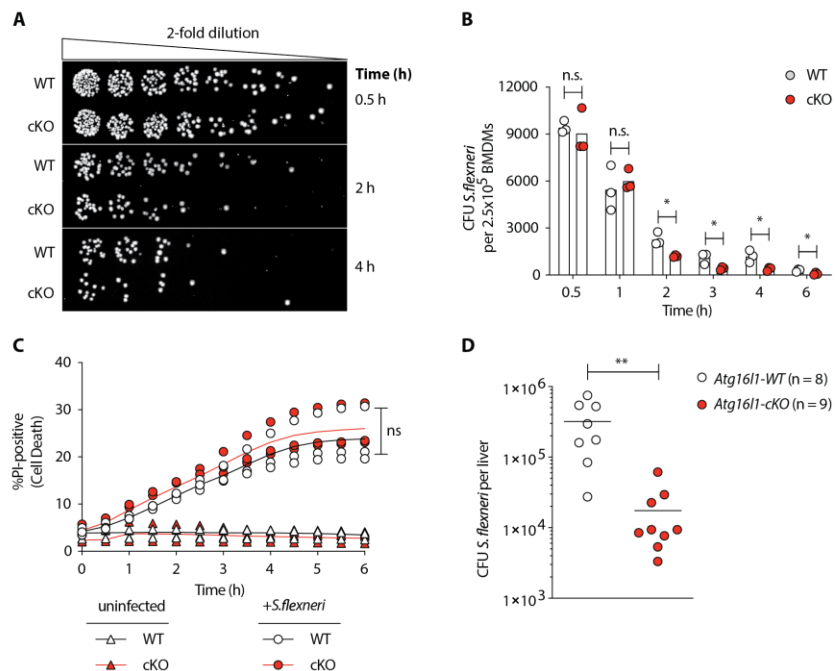

(A) Representative serial dilutions from gentamycin protection assays following *S.flexneri* M90T infection of WT or cKO BMDMs at the indicated timepoints. (B) Comparison of colony forming units (CFUs) per well from three independent infection experiments using BMDM preparations from three different *Atg16l1*-WT or *Atg16l1*-cKO mice. ns, non-significant; 2h \*  $P = 0.01$ , 3h \*  $P = 0.03$ , 4h \*  $P = 0.02$ , 6h \*  $P = 0.03$ , multiple t-test comparison. (C) Percentage of propidium iodide (PI)-positive cells during time-course infection of WT or cKO BMDMs with *S.flexneri* M90T. Graph represents individual values from three independent experiments using three different BMDM preparations. ns, non-significant. (D) Liver bacterial load 24 hours following intravenous injection of *Atg16l1*-WT or *Atg16l1*-cKO mice with *S.flexneri* M90T. Graph shows data from a representative experiment out of four different experiments as log10 CFU count per liver in indicated number of mice, \*\*  $P = 0.0031$ . Outliers removed using ROUT (Q = 1%) method.

145

146 control (*Atg16l1*-WT) or mice lacking ATG16L1 in the myeloid compartment (*Atg16l1*-

147 *cKO*) were subjected to the gentamycin protection assay that enables quantification

148 of intracellular bacteria by enumerating colony forming units (CFUs). We first

149 determined the kinetics of *S.flexneri* killing by following BMDM infection over six

150 hours (MOI 5). Compared to wild type (WT) controls, ATG16L1-deficient BMDMs



151 (cKO) demonstrated accelerated bacterial clearance starting at two hours post-  
152 infection (Figure 1A and 1B). Previous studies demonstrated enhanced sensitivity of  
153 autophagy-deficient cells to programmed cell death following engagement of cytokine  
154 receptors and microbial ligands (Lim et al., 2019; Matsuzawa-Ishimoto et al., 2017;  
155 Orvedahl et al., 2019). Thus, BMDM viability was measured in parallel by quantifying  
156 the propidium iodide (PI)-positive population via live-cell imaging. WT and cKO  
157 BMDMs displayed similar cell death kinetics over the time course of infection,  
158 indicating that accelerated *S.flexneri* killing was not driven by enhanced cell death,  
159 but potentially by other cytosolic factors in cKO BMDMs (Figure 1C).

160 To corroborate this finding *in vivo*, control and *Atg16l1-cKO* mice were  
161 infected with the *S.flexneri* via tail vein injection and CFUs enumerated from hepatic  
162 lysates. Myeloid-specific loss of *Atg16l1* resulted in a markedly decreased bacterial  
163 burden 24 hours post-infection (Figure 1D). Taken together, these observations  
164 establish that ATG16L1 restrains macrophage immunity against cytosolic bacteria  
165 such as *S.flexneri*.

166

### 167 **Multiplexed proteomic profiling of autophagy competent and deficient BMDMs** 168 **following infection.**

169 To reveal factors that may drive enhanced *S.flexneri* killing in ATG16L1-  
170 deficient BMDMs, we characterized changes in global proteome and post-  
171 translational modifications (PTMs) in proteins between WT and cKO BMDMs. To that  
172 end, we applied tandem mass spectrometry coupled with tandem mass tagging  
173 (TMT) 11-plex isobaric multiplexing. Cell lysates were prepared from WT and cKO  
174 BMDMs that were either uninfected (U) or infected at early (E; 45-60min) or late (L;  
175 3-3.5h) time-points with *S.flexneri* (MOI 5). Cumulatively, two 11-plex experiments  
176 were performed with uninfected samples represented in biological triplicates and  
177 infected samples represented in biological quadruplicates (see Methods for details)  
178 (Figure 2A). Data were acquired using the recently established SPS-MS3 approach  
179 wherein dedicated MS3 scan events are collected from fragment ion populations  
180 representing a mixture of the 11 samples and used to report the relative abundance  
181 of each peptide feature per channel (McAlister et al., 2014; Ting et al., 2011).

182 For global proteome profiling, quantitative data was obtained from >103,700  
183 unique peptides mapping to 9430 proteins. From the PTM enriched samples,  
184 quantitative data were obtained for >25,600 unique phosphorylation sites (5052

185 proteins) and >12,400 unique KGG (Ub) sites (3324 proteins). When considering only  
 186 features bearing data in both 11-plexes, the final dataset contained 22 channels of

**Figure 2. Multiplexed proteomic profiling of autophagy competent and deficient BMDMs following infection.**

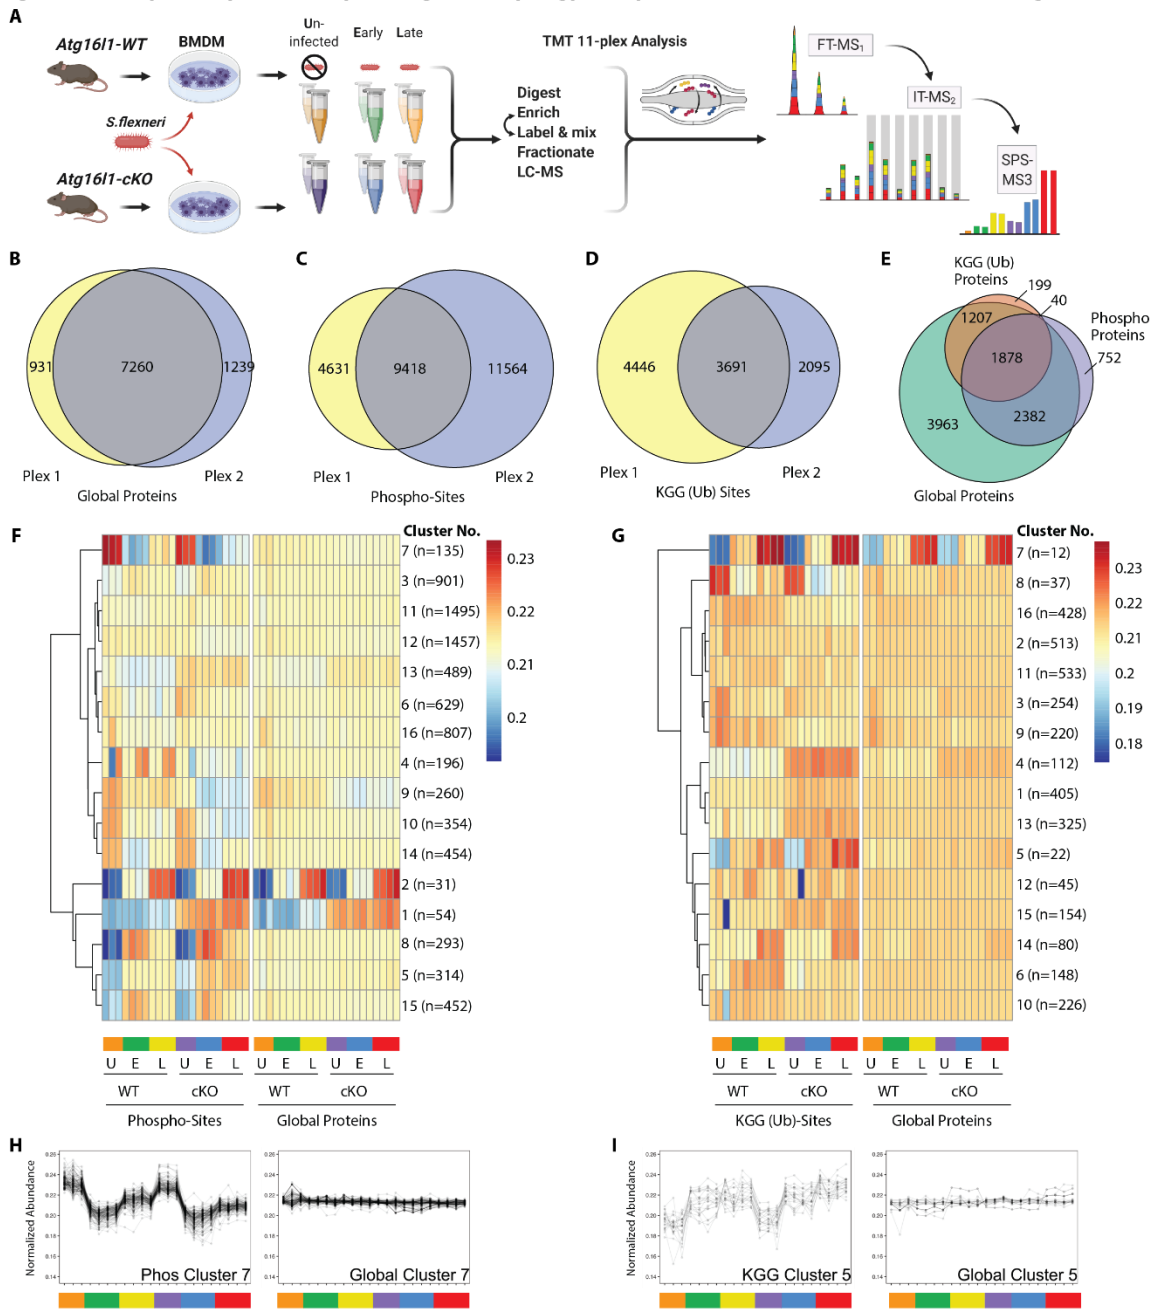

(A) Schematic representation of multiplexed proteomic profiling of macrophages during *S.flexneri* infection. (B-D) Venn diagrams show overlapping quantitative data collected in Plex1 and/or Plex2 for (B) Global Proteins, (C) Phosphorylation sites and (D) KGG (Ub) sites. (E) Venn diagram displays an overlap of quantitative data for Phospho- and KGG (Ub) sites with respect to the Global Proteins quantified. (F and G) Heatmaps displaying K-means clustered quantitative data for (F) Phospho-sites and (G) KGG (Ub) sites relative to their corresponding Global Proteins. Note that Global Protein clustering differs between panels F and G based on the proteins from which PTMs were quantified. (H and I) Line plots showing representative clusters from the Heatmaps above. Phospho Cluster 7 (panel H) and KGG (Ub) Cluster 5 (panel I) each show PTM profiles that diverge from their corresponding Global Protein measurements. Proteins and PTMs making up each cluster are presented in Table S1.

187 quantitative data for 7260 proteins (i.e. global proteome), 9418 phosphorylation sites  
 188 and 3691 KGG modification sites (Figure 2B-D). As expected, ~90% of the post-  
 189

190 translationally modified peptide spectral matches derived from proteins that were also  
191 identified and quantified in the global proteome dataset (Figure 2E). Both within and  
192 between plexes, peptide and protein level quantitative data were highly reproducible  
193 with Pearson correlations ranging from 0.96-0.99 (Figure S1A). Phosphorylation and  
194 KGG profiling data were subjected to K-means clustering, each paired with the  
195 corresponding global proteome data. Heatmap representations revealed clusters of  
196 PTM changes that occur in genotype and/or infection dependent manners (Figure 2F  
197 and 2G). A subset of these clusters comprised PTMs whose quantitative profiles  
198 mirrored that of the underlying protein level due to altered protein expression or  
199 stability (e.g. Phospho Clusters 1-2 in Figure 2F and S1B; KGG Cluster 7 in Figure  
200 2G and S1C). In contrast, other clusters displayed PTM profiles that diverged from  
201 their underlying proteins (e.g. Phospho Cluster 7 in Figure 2F and 2H; KGG Cluster 5  
202 in Figure 2G and 2I). The composition of PTMs and proteins comprising each cluster  
203 are available in Table S1.

204 Interrogation of the uninfected datasets revealed differences between the  
205 genotypes on the global protein level. Consistent with previous observations (Samie  
206 et al., 2018), cKO BMDMs showed upregulation in autophagy receptors, such as  
207 SQSTM/p62 and ZBP1 (Figure S2A). In the phosphorylation and KGG datasets,  
208 interesting observations amongst others concerned elevated phosphorylation of  
209 ubiquitin (RL40) at serine (S) 57 and ubiquitination of FIS1 at lysine (K) 20, which are  
210 involved in endocytic trafficking (Lee et al., 2017; Peng et al., 2003) and  
211 mitochondrial and peroxisomal homeostasis (Bingol et al., 2014; Koch et al., 2005;  
212 Zhang et al., 2012), respectively (Figure S2B and S2C).

213 Interrogation of the infected datasets revealed the dynamic nature of the  
214 macrophage response to infection. For example, global proteome analysis revealed  
215 broad changes in pro-inflammatory cytokines and chemokines at early (GROA), late  
216 (CXL10, IL1A, IL1B) or both (CCL2, TNFA) time-points, as well as marked changes  
217 in several key cell surface receptors (Figure S2D, S3A and S3B). Time-dependent  
218 changes were also observed for components of innate immune signaling that  
219 intersect with the ubiquitin pathway (PELI1), kinase-phosphatase signaling  
220 (DUS1/Dusp1) and GTP/GDP signaling (GBP5) (Figure S3C). For phosphorylation,  
221 notable examples included tyrosine (Y) 431 of the PI3-kinase regulatory subunit  
222 (P85A) and S379 of the interferon regulatory factor (IRF3) (Figure S2E). In the case  
223 of ubiquitination, marked effects are seen for a selective autophagy receptor



224 Tax1BP1 (TAXB1\_K618) and an E3 ubiquitin ligase Pellino (PELI1\_K202) (Figure  
225 S2F), both of which have defined roles at the intersection of cell death and innate  
226 immune signaling (Choi et al., 2018; Gao et al., 2011; Parvatiyar et al., 2010).

227 It is beyond of the scope of this study to describe these in-depth proteomic  
228 observations. Therefore, we developed interactive Spotfire Dashboards as a  
229 resource to facilitate discoveries in cellular pathways of interest by other  
230 investigators. These can be accessed at the following URL:  
231 <https://info.perkinelmer.com/analytics-resource-center>.

232

### 233 **Characterizing PTMs of autophagy proteins and inflammatory signaling nodes** 234 **revealed by loss of *Atg16l1* and infection.**

235 To effectively integrate data for each protein within a single consolidated view,  
236 heatmaps were assembled to show the proteome level change immediately adjacent  
237 to any PTMs that were identified in the phospho- and KGG-enriched samples. In the  
238 example for selective autophagy receptor Tax1bp1 (TAXB1), heatmaps depict  
239 relative abundance of features present in one or both experiments (Plex1 and/or  
240 Plex2) (Figure 3A). Comparisons of interest include cKO versus WT for uninfected,  
241 early and late infection time-point samples. For TAXB1, these show that the global  
242 protein level is elevated upon *Atg16l1* deletion, as are a number of individual  
243 phosphorylation and ubiquitination sites including those quantified in one (e.g. T494,  
244 K624) or both plexes (e.g. S632, S693, K627). Additional comparisons call out time-  
245 dependent differences between infected and uninfected conditions for each genotype  
246 – namely early versus uninfected (E/U) and late versus uninfected (L/U). For TAXB1,  
247 certain PTMs such as phosphorylation at S632 and ubiquitination at K624 and K627  
248 track with the protein, while other PTMs such as phosphorylation at threonine (T) 494  
249 and S693 display time-dependent changes that diverge from the underlying protein  
250 level (Figure 3A). Shown individually, histograms depict the same information for  
251 relative abundance of TAXB1 and its specific PTMs (Figure 3B). Therefore, the  
252 heatmaps provide a succinct visual representation of all detected changes in protein  
253 and PTM abundance.

254 One pathway where we expected to see marked proteome and PTM level  
255 changes upon infection was in autophagy (Figure 3C and S4). We confirmed  
256 genotype-dependent effects on each component of the ATG5-ATG12-ATG16L1 E3  
257 ligase-like complex that conjugates LC3 (MLP3A) to phosphatidylethanolamine

258 (Figure 3D). Only modest changes were seen in the core autophagy machinery  
259 following infection, with the most notable effects being differential phosphorylation of  
260 FIP200 (RBCC1),

**Figure 3. Characterization of proteomic changes in the autophagy pathway.**

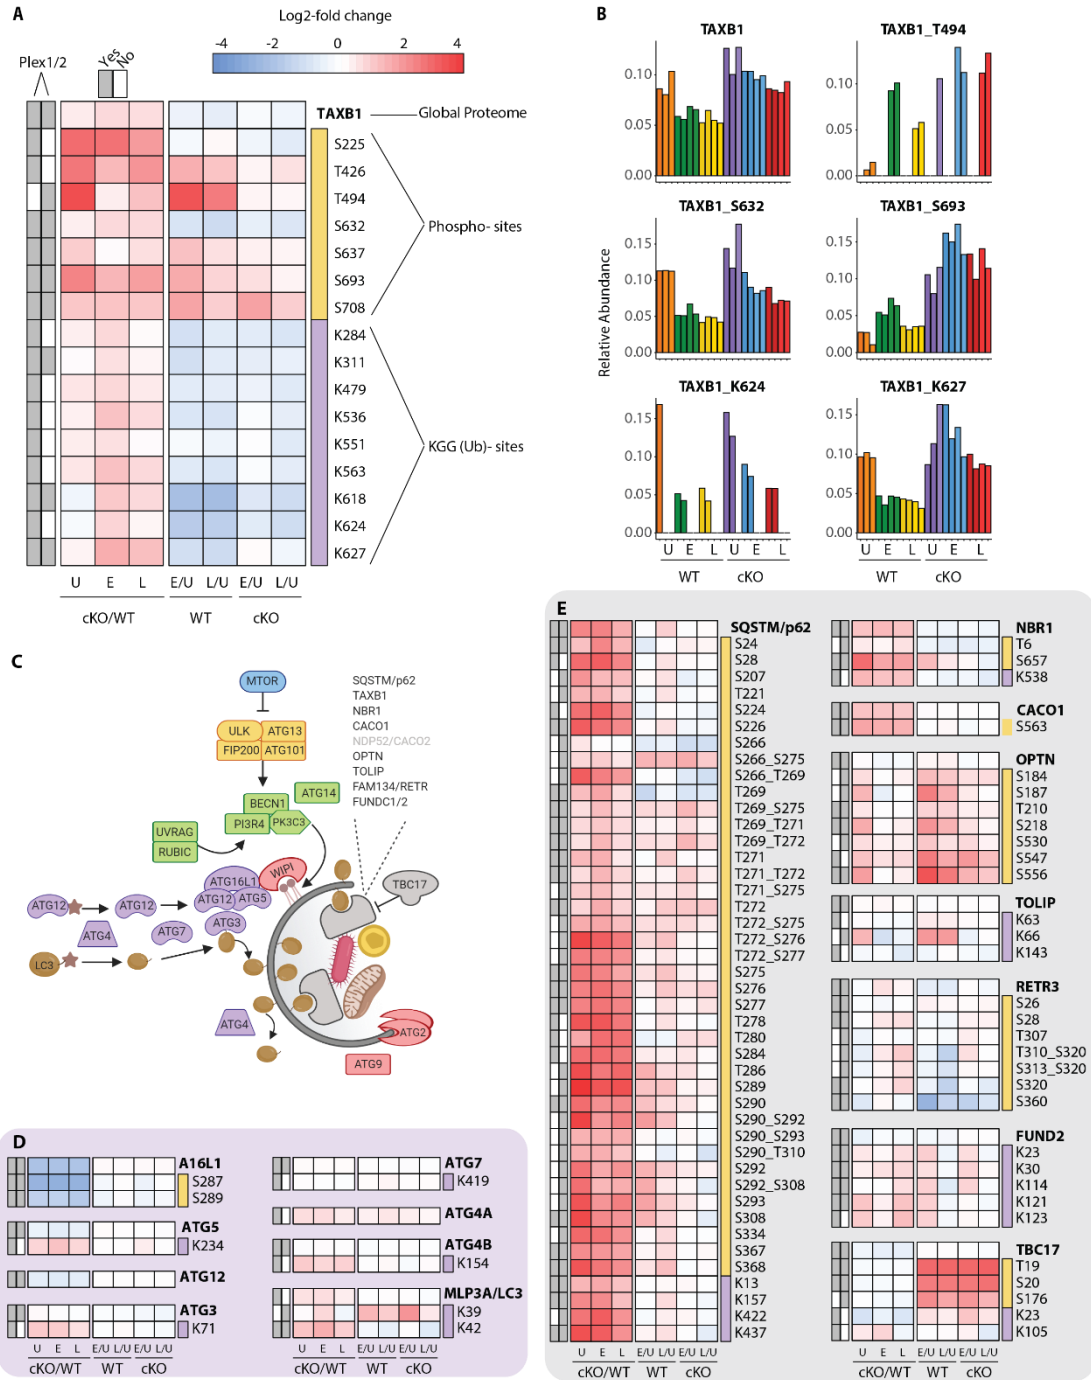

(A) Heatmap representation of log<sub>2</sub> fold changes for global proteome (unmarked), phospho-(yellow section) or KGG (Ub)- sites (purple section) measurements made for TAXB1. Data are shown for features quantified from uninfected (U) WT and cKO BMDMs or cells infected at early (E) or late (L) timepoints with *S.flexneri*. Log<sub>2</sub> transformed ratios are shown for contrasting genotypes (cKO/WT) at each infection timepoint (U, E, L) on the left and between infection timepoints (E/U and L/U) within each genotype on the right. Grey boxes denote quantification of the feature in Plex1 and/or Plex2. Modification sites on TAXB1 denote the modified amino acid (S/T/Y/K) and residue number. (B) Bar graphs showing the relative abundance of TAXB1 global protein and representative phospho- and KGG (Ub)- sites in each of the six conditions. Note that TAXB1\_K624 (Plex1) and TAXB1\_T494 (Plex2) represent data collected only in a single Plex, with the relative abundance of TMT reporter ions summing up to 1.0. (C) Schematic representation of macro-autophagy & selective autophagy machinery. (D and E) Heatmap representations of E1/E2/E3-like pathway components responsible for conjugating LC3 (MLP3A) to regulate autophagosome membrane elongation (D) and selective autophagy receptors (E). The background shading for each panel corresponds to the functional color coding of proteins in the pathway schematic shown in (C).

262 ATG2B, and VPS15/p150 (PI3R4) (Figure S4C-E). More substantial effects were  
263 seen for phosphorylation events on autophagy receptors such SQSTM/p62,  
264 Optineurin (OPTN) (Figure 3E) and TAXB1 (Figure 3A). In the case of p62, singly  
265 and multiply phosphorylated forms of T269, T271, T272, S275/6, S277 were elevated  
266 in ATG16L1-deficient macrophages, most notably at the early timepoint post-  
267 infection. S28 phosphorylation of p62 was previously described to regulate activation  
268 of the antioxidant response (Xu et al., 2019a). Interestingly, we detected a substantial  
269 increase in basal S28 phosphorylation in cKO BMDMs, indicating that ATG16L1  
270 deficiency may impact oxidative stress (Figure S4F).

271 Our PTM datasets showed dynamic regulation of a range of inflammatory  
272 signaling components by infection as well as autophagy (Figure S5). For example,  
273 we detected ubiquitination of K278 of NEMO (Figure S5F), consistent with increased  
274 LUBAC activity (Tokunaga et al., 2009). Interestingly, the global proteome data  
275 reported a peptide with the sequence GGMQIFVK that is derived from linear  
276 polyubiquitin chains formed by the LUBAC complex. This linear ubiquitin peptide was  
277 elevated upon infection in both WT and cKO BMDMs (Figure S3D), further  
278 supporting increased E3 ubiquitin ligase activity of LUBAC. As noted above, TAXB1  
279 phosphorylation was induced upon infection at a number of sites (Figure 3A). These  
280 changes in TAXB1 correlated with numerous elevated PTMs of the A20 (TNAP3)  
281 deubiquitinase, a protein whose anti-inflammatory activity modulates NF- $\kappa$ B signaling  
282 (Figure S5C). Interestingly, phosphorylation at S693 of TAXB1 is important for the  
283 assembly of TNAP3-containing complex and negative regulation of NF- $\kappa$ B signaling  
284 (Shembade et al., 2011) (Figure 3A).

285 We also identified notable changes across numerous components implicated  
286 in pathogen sensing such as TLRs, RLRs, NLRs and STING/cGAS (Supplementary  
287 Figure S6A and S6B). Our datasets confirm numerous previously demonstrated  
288 PTMs that occur in response to infection, such as elevated phosphorylation of RIPK1  
289 at S321 (Figure S5E), XIAP at S429 or IRF3 on multiple sites (Figure S6D and S6E).  
290 Similar effects were observed for ABIN1 (TNIP1), which showed minimal changes in  
291 global protein levels, but elevated ubiquitination at multiple lysines including K360,  
292 K402, K480 at both timepoints and higher levels in cKO than WT (Figure S5F).  
293 Caspase-8 ubiquitination was elevated at K169 in both WT and cKO early post-  
294 infection, but was sustained through the late timepoint only in ATG16L1-deficient  
295 BMDMs (Figure S5G). Within the ubiquitin pathway, E3 ubiquitin ligases including

**Table 1.** Novel post-translational modifications in specific autophagy, innate sensing, inflammatory signaling and cell death pathways revealed by TMT-MS of BMDMs following *S.flexneri* infection.

| <b>Autophagy</b>                          |                                          |                              |
|-------------------------------------------|------------------------------------------|------------------------------|
| <b>Protein name</b>                       | <b>Post-translational modification</b>   |                              |
|                                           | <b>pSTY/Phosphorylation</b>              | <b>KGG/Ubiquitination</b>    |
| ATG5                                      |                                          | K234                         |
| MLP3A/LC3                                 |                                          | K39                          |
| TAX1BP1                                   | T426, T494                               | K284, K311, K536, K551, K624 |
| P62/SQSTM1                                | T280, S292, S308                         |                              |
| NBR1                                      | T6                                       |                              |
| FUND2                                     |                                          | K114, K121                   |
| TBC17                                     | S176                                     | K105                         |
| RBCC1/FIP200                              | T642                                     |                              |
| PI3R4/VPS15                               | S903, T904                               |                              |
| RUBIC                                     | S252, S552, S554                         |                              |
| ATG2B                                     | S401                                     | T1570                        |
| <b>Innate sensing</b>                     |                                          |                              |
| <b>Protein name</b>                       | <b>Post-translational modification</b>   |                              |
|                                           | <b>pSTY/Phosphorylation</b>              | <b>KGG/Ubiquitination</b>    |
| DDX58/RIG-I                               |                                          | K256                         |
| MAVS                                      | Y332                                     |                              |
| CGAS                                      |                                          | K55                          |
| TLR4                                      |                                          | K692                         |
| MYD88                                     | S136                                     |                              |
| IRAK2                                     | S175, T587, S615                         |                              |
| IRAK3                                     |                                          | K60, K163, K392              |
| IRAK4                                     | T133, S134, S175, S186                   |                              |
| TBK1                                      | S509                                     |                              |
| IRF3                                      | T126, S130                               |                              |
| IRF7                                      | S227, T277                               |                              |
| IFIT1                                     | S272, S296                               | K89, K117, K123, K406, K451  |
| IFIT2                                     |                                          | K41, K61, K158, K291         |
| IFIT3                                     | S327, S333                               | K246, K252, K266, K396       |
| ISG15                                     | K30                                      |                              |
| <b>Inflammatory signaling, cell death</b> |                                          |                              |
| <b>Protein name</b>                       | <b>Post-translational modification</b>   |                              |
|                                           | <b>pSTY/Phosphorylation</b>              | <b>KGG/Ubiquitination</b>    |
| TNFR1B/TNFR2                              |                                          | K300                         |
| M3K7/TAK1                                 | S331                                     |                              |
| TAB2                                      | S353, T376, S584                         |                              |
| TRAF1                                     |                                          | K120                         |
| TRAF2                                     |                                          | K194                         |
| IKBz                                      | T188                                     | K5, K120, K132               |
| NFKB1                                     |                                          | K275                         |
| REL                                       | S321                                     |                              |
| RNF31/HOIP                                | S441, S973                               | K911                         |
| TNAP3/A20                                 | S217, T567, S622, S730                   | K31, K213                    |
| TNIP1/ABIN1                               | S601                                     | K288, K317, K386             |
| TNIP2/ABIN2                               | T194, S196                               |                              |
| CASP8                                     | S60                                      | K33, K274                    |
| CFLAR/cFLIP                               |                                          | K175, K390                   |
| RIPK1                                     |                                          | K429                         |
| RIPK2                                     | S183, S381                               | K369                         |
| RIPK3                                     | S173, S177, S254, T386, T392, T398, T407 | K145, K230, K298             |

296 HOIP (RNF31), TRAF2, and Pellino (PELI1) showed marked infection dependent  
 297 changes at the level of phosphorylation (e.g. RNF31\_S445) and ubiquitination (e.g.  
 298 PELI\_K202 early, TRAF2\_K313 late) (Figure S5C).



299 Cross-referencing all highlighted PTMs with PhosphoSitePlus<sup>®</sup> revealed that  
300 ~60% of PTMs were previously identified in distinct large-scale proteomic screens  
301 without assigning a specific biological role, but only 15% of PTMs have been studied  
302 in connection to a biological function (Tables S2 and S3). This analysis also revealed  
303 that nearly 25% of PTMs in autophagy, innate sensing, inflammatory and cell death  
304 signaling identified in our study appear to be novel (summarized in Table 1).

305

### 306 **Elevated oxidative stress in ATG16L1-deficient macrophages contributes to** 307 **accelerated bacterial killing.**

308 To reveal cellular processes overrepresented in cKO BMDMs in an unbiased  
309 manner, we leveraged the deep coverage of the global proteome by TMT-MS and  
310 performed gene set enrichment analysis (GSEA). Unexpectedly, this analysis  
311 revealed a strong enrichment of the components of reactive oxygen species (ROS)  
312 pathway (Figure 4A and Table S4 for protein set terms). Further assessment of the  
313 components of this gene ontology term revealed critical regulators of redox  
314 homeostasis that were increased in uninfected cKO BMDMs at steady state relative  
315 to WT (Figure 4B). This group of proteins included several factors involved in  
316 glutathione (GSH) synthesis, such as the glutamate-cysteine ligase regulatory  
317 subunit (GSH0/Glcm) and GSH synthetase (GSHB/Gss), and GSH regeneration,  
318 such as microsomal glutathione S-transferase (MGST1) and NAD(P)H  
319 dehydrogenase 1 (NQO1). Additionally, several ROS converting enzymes including  
320 catalase (CATA) and peroxiredoxin 1 (PRDX1) were also elevated in cKO BMDMs at  
321 steady state. Furthermore, a subset of these redox regulators changed abundance  
322 upon *S.flexneri* infection. For example, prostaglandin dehydrogenase 1 (PGDH)  
323 displayed a time dependent decrease upon infection that was accentuated in cKO  
324 versus WT, consistent with its known susceptibility to ROS (Wang et al., 2018).  
325 Conversely, levels of the cysteine-glutamate antiporter SLC7A11 (XCT) (Conrad and  
326 Sato, 2012; Sato et al., 1999) exhibited a significant increase in cKO BMDMs  
327 following infection (Figure 4C). Thus, ATG16L1 deficiency and *S. flexneri* infection  
328 might each independently elevate ROS levels, with ATG16L1 deficiency further  
329 driving a compensatory increase in the lipid ROS regulatory pathway during infection  
330 to maintain macrophage viability.

331 To determine if ATG16L1-deficient BMDMs are exposed to higher oxidative  
332 stress, we first used a fluorogenic probe (CellRox green) that enables measurement

333 of oxidative stress by confocal fluorescence microscopy. Interestingly, despite

**Figure 4. Elevated oxidative stress in ATG16L1-deficient macrophages contributes to accelerated bacterial killing.**

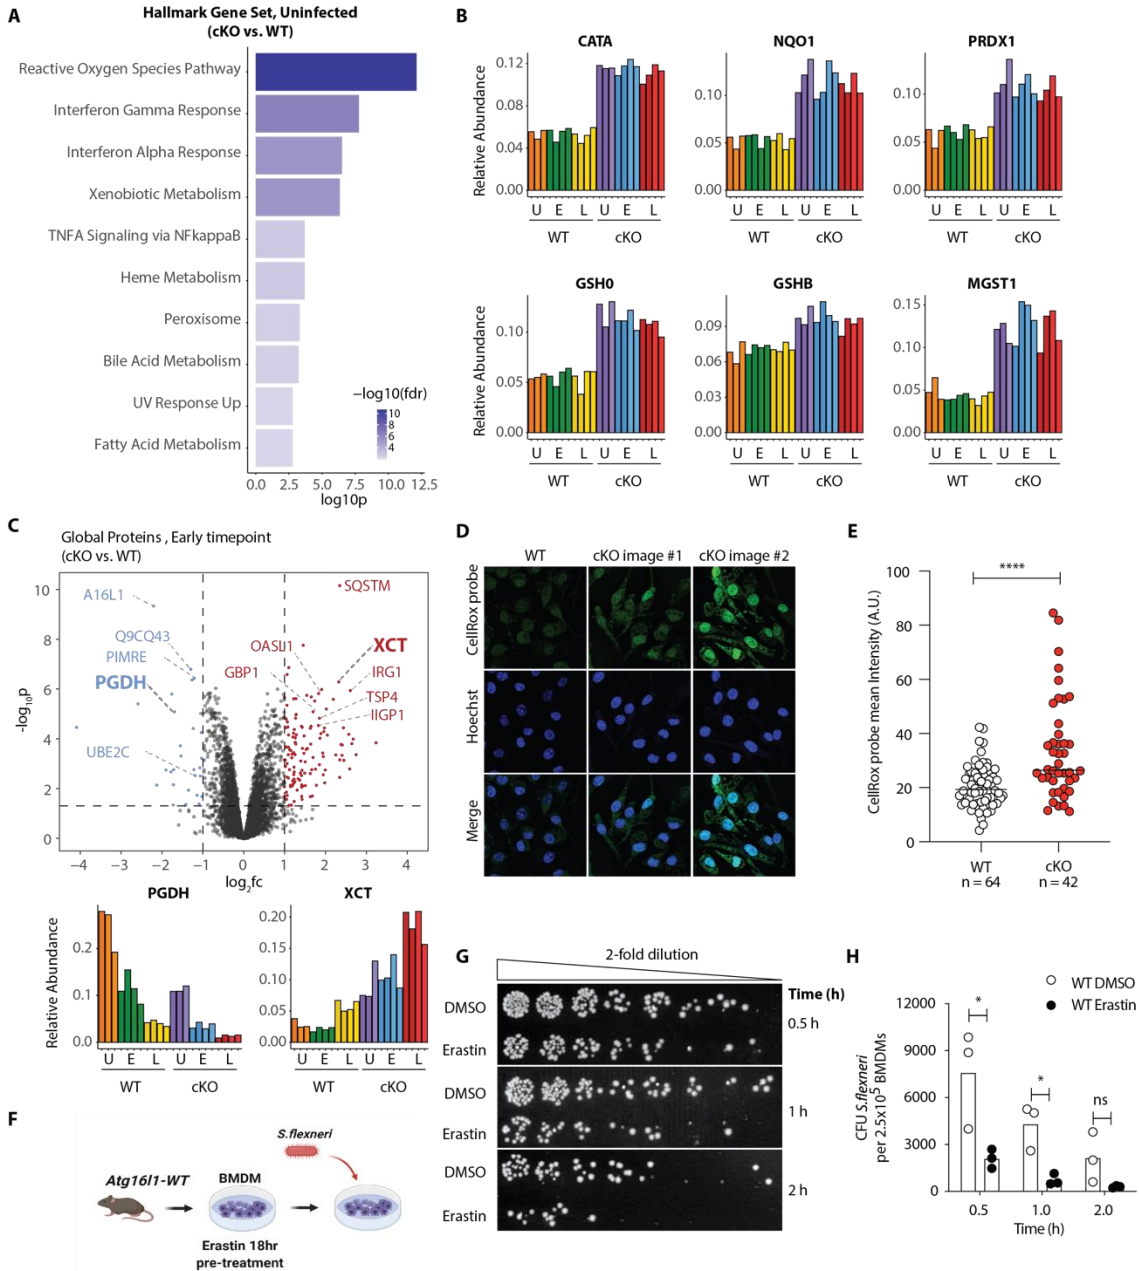

(A) Gene set enrichment analysis (GSEA) of global proteome data showing cellular processes overrepresented in uninfected cKO over WT BMDMs. (B) Bar graphs showing the relative abundances for selected proteins involved in redox regulation and detoxifying reactive oxygen species. (C) Volcano plot of global protein changes at early infection timepoint between the genotypes. Proteins enriched in cKO and WT BMDMs are highlighted in red and blue, respectively. Bar graphs showing the cumulative effects of genotype and infection on PGDH and XCT protein levels. (D) Representative images from experiments shown in (E) demonstrating CellRox probe intensity, Hoechst nuclear staining and merged images. (E) Quantification of CellRox green mean intensity in WT and cKO BMDMs. Graph shows single cell data from a representative experiment (n = 3). Unpaired t test \*\*\*\* P < 0.0001. (F) Schematic representation of infection experiment using pre-treatment of BMDMs with Erastin. (G) Representative serial dilutions from gentamycin protection assays following *S. flexneri* M90T infection of WT BMDMs in the presence of DMSO or Erastin (4  $\mu\text{g/ml}$ ) at the indicated timepoints. Erastin-treated WT BMDMs were pre-treated with Erastin for 18 hours prior infection (T = 0). (H) Comparison of CFUs from three independent infection experiments using BMDM preparations from three different *Atg16l1*-WT mice. ns, non-significant; 0.5 h \* P = 0.04, 1 h \* P = 0.01.

334  
335

upregulation of numerous redox regulatory factors, CellRox probe intensity was

336 significantly higher in cKO BMDMs (Figure 4D and 4E). In line with these  
337 observations, we also detected an increase in the ratio between oxidized versus  
338 reduced GSH (GSSH/GSH) in cKO BMDMs (Figure S7A-C). Given the central role of  
339 autophagy in mitochondrial turnover, we assessed mitochondrial morphology and  
340 respiration as a likely source of oxidative damage in uninfected cKO BMDMs (Figure  
341 S7D and S7E). However, no mitochondrial defect could be identified; this warrants  
342 further investigation into the underlying mechanism(s) of elevated oxidative stress in  
343 ATG16L1-deficient BMDMs.

344 Taken together, observations that cKO BMDMs are burdened with higher  
345 oxidative stress suggest that elevated ROS in these cells mandate upregulation of  
346 redox homeostasis factors in order to maintain viability (Tal et al., 2009). We thus  
347 asked whether accumulation of cytosolic ROS could be recapitulated by suppression  
348 of glutathione import in wild type macrophages. BMDMs were pre-treated with  
349 Erastin, a small molecule inhibitor of XCT, which diminishes the levels of reduced but  
350 not oxidized GSH in cells (Dixon et al., 2012). Time-course treatment demonstrated  
351 that cKO BMDMs are slightly more sensitive to Erastin after prolonged incubation,  
352 consistent with a basal elevation in cellular ROS (Figure S7F). Interestingly, 24-hour  
353 Erastin treatment of WT BMDMs phenocopied a steady-state ROS level in cKO cells,  
354 while no further increase in ROS was observed in cKO BMDMs treated with Erastin  
355 (Figure S7G). We hypothesized that induction of cellular ROS in WT BMDMs by  
356 pharmacological inhibition of XCT should phenocopy the accelerated *S.flexneri*  
357 clearance seen in cKO cells. To test this, WT BMDMs were pre-treated with Erastin  
358 for 18 hours prior infection and Erastin was maintained throughout the experiment  
359 (Figure 4F). Importantly, Erastin treatment did not increase WT BMDM cell death  
360 within the time-course (Figure S7H). However, Erastin-treated WT BMDMs showed  
361 enhanced elimination of *S.flexneri* following infection (Figure 4G and 4H),  
362 demonstrating that elevated oxidative stress in WT BMDMs accelerates killing of  
363 *S.flexneri*, consistent with enhanced microbicidal capacity of ATG16L1-deficient  
364 BMDMs.

365

## 366 Discussion

367 Emerging insights from genetic mouse models have revealed that loss of  
368 *Atg16l1* in the immune and epithelial compartments lowers the threshold for an  
369 inflammatory response (Cadwell et al., 2010; Hubbard-Lucey et al., 2014; Lim et al.,

2019; Matsuzawa-Ishimoto et al., 2017). Consistently, deletion of canonical autophagy genes in the innate and adaptive immune compartments have demonstrated enhanced pathogen clearance (Marchiando et al., 2013; Martin et al., 2018; Samie et al., 2018; Wang et al., 2020) as well as tumor control *in vivo* (Cunha et al., 2018; DeVorkin et al., 2019). These observations have prompted a re-evaluation of antimicrobial selective autophagy (xenophagy) to better understand how loss of core autophagy genes impacts cell-autonomous innate immunity against pathogenic intracellular bacteria.

In this study we show that macrophages deficient in ATG16L1 demonstrate an accelerated killing of *Shigella flexneri* *in vitro* and *in vivo*. To identify mechanisms behind this phenotype we employ isobaric multiplexing using the TMT technology, which emerged as being capable of near-comprehensive characterization of the global proteome (Lapek et al., 2017). When isobaric multiplexing methods are coupled with enrichment, it enables quantification of post-translational modifications on thousands of individual proteins (Rose et al., 2016). This method is ideally suited for interrogation of a complex response, such as infection of a host cell with an intracellular pathogen, where the diversity of downstream changes does not lend themselves to candidate approaches involving immunoblotting.

Our approach identifies multiple novel PTMs in components of inflammatory cytokine signaling, innate sensing and the core autophagy machinery that emerge as a consequence of *S.flexneri* infection. The comparison of early and late infection time-points shows a complex dynamic in the stability of PTMs as well as total protein abundance. The comparison of wild type versus ATG16L1-deficient BMDMs further reveals critical nodes in each of the above pathways that are under regulatory control by autophagy. The PTMs listed in Table 1, S2 and S3 represent a sizeable fraction of the relevant post-translational changes that occur in macrophages during infection and/or loss of autophagy. It is beyond the scope of a single study to interrogate these changes comprehensively; we encourage groups to utilize this study as a resource to explore PTMs in their pathway(s) of interest. We have provided interactive, web-accessible Spotfire Dashboards to enable user interrogation of the Global Proteome, Phospho-proteome, and the Ubiquitinome (KGG) datasets (<https://info.perkinelmer.com/analytics-resource-center>).

Our study reveals that basal accumulation of cellular ROS in cKO BMDMs enforces a compensatory increase in antioxidant responses exemplified by elevated

404 protein abundances of key components of the glutathione synthesis machinery. This  
405 permits cellular viability under relatively elevated cytosolic ROS levels, which in turn  
406 suppresses *S.flexneri* expansion in BMDMs. However, overall macrophage fitness is  
407 likely compromised owing to a shift in the basal redox pathway set-point, and the  
408 accelerated clearance of *S.flexneri* observed in livers of *Atg16l1-cKO* mice may also  
409 contribute to inflammation-mediated loss of the hepatic myeloid cell niche *in vivo*.  
410 Pharmacological depletion of GSH phenocopies genetic loss of *Atg16l1*, accelerating  
411 *S.flexneri* clearance in wild type cells. These findings should prompt further  
412 investigation of autophagy in the intestinal epithelium, another key cellular niche for  
413 virulent *S.flexneri*. It is important to note that there are no viable murine models of  
414 enteric *S.flexneri* infection; development of model systems that permit intestinal  
415 infection while maintaining adequate inflammatory responses will be key in  
416 reconciling cell-based versus *in vivo* findings.

417 Our study provides the most comprehensive multiplexed proteomic analysis of  
418 the macrophage response to a cytosolic enteric pathogen to date. This novel  
419 resource will be of broad utility to the study of myeloid signal transduction, host-  
420 pathogen interaction and innate immunity.



## 421 **Materials and Methods**

422 **Mice.** All animal experiments were performed under protocols approved by the  
423 Genentech Institutional Animal Care and Use Committee (Protocol ID 17-2842).  
424 Generation of myeloid-specific deletion of *Atg16l1* was achieved by crossing *LysM-*  
425 *Cre+* mice with *Atg16l1*<sup>loxp/loxp</sup> mice and was described previously (Murthy et al.,  
426 2014). All mice were bred onto the C57BL/6N background. All *in vivo* experiments  
427 were performed using age-matched colony controls.

428 **Bacterial strains and culture.** *Shigella flexneri* 5a strain M90T used in this study  
429 was obtained from ATCC (ATCC<sup>®</sup>BAA-2402<sup>™</sup>). *Shigella flexneri* strain M90T  $\Delta$ *mxIE*  
430 used in this study was obtained from a *S. flexneri* mutant collection (Sidik et al.,  
431 2014). Frozen bacterial stocks were streaked onto tryptic soy agar (TSA) plates and  
432 grown at 37 °C overnight. Plates were kept at 4 °C for up to 2 weeks.

433 **Bone marrow-derived cells isolation.** Femurs and tibias were collected aseptically.  
434 After removing most of the muscle and fat, the epiphyses were cut and bones were  
435 placed into PCR tubes individually hung by the hinge into a 1.5 ml Eppendorf. The  
436 bone marrow was flushed by short centrifugation at 10,000 rpm for 30 seconds. Red  
437 blood cells were lysed with RBC lysis buffer (Genentech) by incubating for 5 minutes  
438 at RT. Cells were then pelleted and resuspended in BMDM media [high glucose  
439 Dulbecco's Minimum Essential Media (DMEM) (Genentech) + 10% FBS (VRW,  
440 custom manufactured for Genentech) + GlutaMAX (Gibco, 30050-061) + Pen/Strep  
441 (Gibco, 15140-122) supplemented with 50 ng/ml recombinant murine macrophage-  
442 colony stimulating factor (rmM-CSF, Genentech)] and plated in 15-cm non-TC  
443 treated dishes for 5 days (Petri dish, VWR, 25384-326). Fresh BMDM media was  
444 added on day 3 without removal of original media. On day 5, macrophages were  
445 gently scraped from dishes, counted and re-plated on TC-treated plates of the  
446 desired format for downstream assays in fresh BMDM media. After overnight culture  
447 in BMDM media, assays were performed on day 6 BMDMs.

448 **BMDM infections in 24-well plates.** BMDMs isolated from control *LysM-Cre+* or  
449 *LysM-Cre+ Atg16L1*<sup>loxp/loxp</sup> mice were plated at  $2.5 \times 10^5$  cells/well in 24-well assay  
450 plates (Corning, 353047) in BMDM media. A duplicate plate was always plated for  
451 total PI-positive cell number enumeration after overnight incubation using IncuCyte  
452 ZOOM as described elsewhere. Bacterial cultures were prepared by picking a single  
453 bacterial colony from TSA plates and grown in 10 mL tryptic soy broth (TSB) in a  
454 shaking incubator overnight at 37 °C. After overnight incubation bacteria were

455 subcultured in fresh 10 mL of TSB at 37 °C until OD600 0.5 - 0.8, pelleted by  
456 centrifugation, resuspended in 1:1000 poly-L-lysine (Sigma-Aldrich, P4707) in PBS  
457 and incubated for 10 minutes at RT. Cell suspension was then centrifuged and the  
458 pellet washed twice with PBS and once with the infection media [high glucose DMEM  
459 (Genentech) + 10% FBS (VRW, custom manufactured for Genentech) + GlutaMAX  
460 (Gibco, 30050-061)]. After the final wash the bacterial pellet was resuspended in the  
461 infection media and OD600 was remeasured. To prepare multiplicity of infection  
462 (MOI) of 5 in the infection media, total PI-positive object count per well was used for  
463 accurate MOI calculations for every independent infection experiment. A cell  
464 suspension containing lysine coated bacteria were added to the wells at MOI 5 in a  
465 total volume of 250 µl/well and allowed to adhere by incubating for 30 minutes at 37  
466 °C in a CO<sub>2</sub> incubator. After 30 minutes, bacterial suspension was aspirated and  
467 replaced with 500 µl/well of fresh infection media supplemented with gentamicin at 50  
468 µg/mL (Sigma-Aldrich, G1397). This was defined as the time-point T = 0 minutes.  
469 Assay plates were subsequently incubated at 37 °C in a CO<sub>2</sub> incubator and used at  
470 the indicated time-points for CFU enumeration.

471 **BMDM infections in 24-well plates with compounds.** For experiments with Erastin  
472 (Sigma-Aldrich, E7781), day 5 BMDMs were plated at  $2.5 \times 10^5$  cells/well in 24-well  
473 assay plates (Corning, 353047) in BMDM media supplemented with Erastin at 4  
474 µg/ml and incubated at 37 °C in a CO<sub>2</sub> incubator for 18 hours before infection. A  
475 duplicate plate was also seeded and used for PI-positive object count per well  
476 enumeration to ensure accurate MOI as described elsewhere. The bacterial culture  
477 was prepared essentially as described elsewhere with the following modifications.  
478 After the final wash with infection media the bacterial pellet was resuspended in the  
479 infection media, OD600 was remeasured and bacterial suspension of MOI 10 was  
480 prepared. A cell suspension containing lysine coated bacteria was mixed 1:1 with  
481 infection media containing Erastin 8 µg/ml and added to the wells at MOI 5 in a total  
482 volume of 250 µl/well and allowed to adhere by incubating for 30 minutes at 37 °C in  
483 a CO<sub>2</sub> incubator. After 30 minutes, bacterial suspension was aspirated and replaced  
484 with 500 µl/well of fresh infection media supplemented with gentamicin at 50 µg/mL  
485 (Sigma-Aldrich, G1397) and Erastin at 4 µg/ml as indicated.

486 **BMDM infections in 15-cm dishes for TMT proteomics.** For large scale infections,  
487 5-day differentiated BMDMs isolated from control *LysM-Cre+* or *LysM-Cre+*  
488 *Atg16L1<sup>loxp/loxp</sup>* mice were plated at  $10 \times 10^6$  cells per 15-cm non-TC treated dish

489 (Petri dish, VWR, 25384-326) in BMDM media. Bacterial suspension was prepared  
490 essentially as described elsewhere with the following modifications. A suspension of  
491 lysine coated bacteria in infection media were added to the dishes containing  
492 BMDMs at MOI 5 in a volume of 15 ml/dish and allowed to adhere by incubating for  
493 30 minutes at 37 °C in a CO<sub>2</sub> incubator. After 30 minutes, the medium was aspirated  
494 and replaced with 50 ml/dish of fresh infection media supplemented with gentamicin  
495 at 50 µg/mL (Sigma-Aldrich, G1397). This was defined as the time-point T = 0  
496 minutes. Assay plates were subsequently placed at 37 °C in a CO<sub>2</sub> incubator and  
497 samples collected after 30 - 45 minutes incubation ('early' infection time-point) or  
498 after 3 - 3.5 hours incubation ('late' infection time-point). At the indicated time-points  
499 a set of 10 dishes per genotype was used to prepare cell lysates for downstream  
500 proteomic analysis. To prepare cell lysates, infection media was first aspirated and  
501 cells washed once with PBS. Cells were then scrapped in the presence of Urea lysis  
502 buffer (20mM HEPES pH 8.0, 9M Urea, 1mM sodium orthovanadate, 2.5 mM sodium  
503 pyrophosphate, 1mM β-glycerolphosphate) and cell suspension stored at -80 °C until  
504 further processing(Kirkpatrick et al., 2013).

505 ***In vivo Shigella flexneri* infection.** Mice were injected intravenously in the tail vein  
506 with *Shigella flexneri* (M90T) bacterial culture that was prepared by picking a single  
507 bacterial colony from TSA plates and grown in 10 mL tryptic soy broth (TSB) in a  
508 shaking incubator overnight at 37 °C. After overnight incubation bacteria were sub-  
509 cultured in fresh 10 mL of TSB at 37 °C until OD<sub>600</sub> 0.5 - 0.8, pelleted by  
510 centrifugation, washed with PBS once, resuspended in PBS and OD<sub>600</sub> was  
511 recounted. Each animal was injected with 100 µl of bacterial suspension in PBS  
512 containing 2 x 10<sup>6</sup> Colony Forming Units (CFUs) *S.flexneri* (M90T). Mice were  
513 euthanized after 6 or 24 hours post infection to harvest spleen and liver for CFUs  
514 enumeration and blood for cytokine profiling.

515 **Colony forming units (CFUs) assays.** To determine CFUs in infected BMDMs,  
516 infection media was aspirated, cells were washed once with PBS and lysed by  
517 adding 250 µl/well of 0.1 % Igepal CA-630 (Sigma-Aldrich, I8896) in PBS, incubated  
518 for 5 minutes, resuspended and an aliquot of 200 µl was transferred to 96-well U-  
519 bottom plate (Costar, 3799) for making two-step serial dilutions in 0.1 % Igepal CA-  
520 630 in PBS. Subsequently, 5 µl of each serial dilution was plated on TSA plates in  
521 triplicates, allowed to evaporate at RT after which the plate was placed in a 37 °C  
522 incubator overnight. After overnight incubation, colonies from individual dilutions were

523 counted and used for determining CFUs per well. To determine CFUs in the liver,  
524 mice were euthanized at the indicated time-points after infection and the livers were  
525 surgically removed and placed in PBS on ice. Livers were processed in 5 ml of 0.1 %  
526 Igepal CA-630 (Sigma-Aldrich, I8896) in PBS using the gentleMACS™ C Tubes  
527 (Miltenyi Biotec, 130-096-334) in combination with the gentleMACS™ Octo  
528 Dissociator (Miltenyi Biotec, 130-095-937) for the automated dissociation of tissues  
529 using standard tissue dissociation programs (program sequence: m\_liver\_01\_02;  
530 m\_liver\_02\_02, m\_liver\_01\_02). Tissue suspensions were filtered through 100 μM  
531 filters (CellTreat, 229485) and remaining liver tissue was additionally homogenized  
532 using the rubber seal of the 5 ml syringe plunger. The resultant liver tissue  
533 suspension was used for generating serial dilutions and plated on TSA plates for  
534 CFUs enumeration as described elsewhere.

535 **IncuCyte assays.** For IncuCyte assays, BMDMs were plated at  $2 \times 10^4$  cells/well in  
536 flat-bottom 96-well (Corning, 353072) or at  $2.5 \times 10^5$  cells/well in 24-well (Corning,  
537 353047) assay plates. After overnight incubation at 37 °C in a CO<sub>2</sub> incubator, cells  
538 were used for infection experiments or treatments with compounds or growth factors  
539 as indicated. BMDM viability over time was assessed by supplementing assay media  
540 [(high glucose DMEM (Genentech) + 10% FBS (VRW, custom manufactured for  
541 Genentech) + GlutaMAX (Gibco, 30050-061) + Pen/Strep (Gibco, 15140-122)] with  
542 propidium iodide (PI) dye for live-cell imaging at 1:1000 (Invitrogen, P3566), and then  
543 measuring PI-positive cells per mm<sup>2</sup> using live cell imaging with IncuCyte ZOOM  
544 (IncuCyte systems, Essen Biosciences) in a time-course experiment. Percent cell  
545 death was calculated by dividing PI-positive cells per mm<sup>2</sup> with total plated cells per  
546 mm<sup>2</sup>. Total plated cells were enumerated from a duplicate plate seeded at the same  
547 time as the assay plates. After overnight incubation, media in the duplicate plate was  
548 exchanged to assay media containing 0.06 % NP-40 supplemented with 1:1000 PI,  
549 and imaged at a single time-point using IncuCyte ZOOM after 10-minute incubation.

550 **GSH assays.** BMDMs were established as described and  $5 \times 10^6$  of BMDMs were  
551 pelleted by centrifugation, the pellet was lysed in mammalian lysis buffer (Abcam,  
552 ab179835), incubated 10' at RT and centrifuged at top speed at 4°C 15min.  
553 Supernatant was transferred to a fresh tube and used for deproteinization following  
554 manufacturer's instructions (Abcam, ab204708). The resultant supernatant was used  
555 for determining reduced GSH, total GSH and oxidized GSSG was calculated as per  
556 manufacturer's instructions (Abcam, ab138881).

557 **Fluorescence microscopy.** BMDMs grown on 96-well plates (Greiner Bio, 655090)  
558 were treated with 10  $\mu$ M CellRox Green reagent for 30 minutes according to  
559 manufacturer's protocol (Thermo Fisher Scientific, C10444), then fixed in 4 %  
560 paraformaldehyde (PFA) solution in PBS (ChemCruz, SC281692) for 15 minutes at  
561 RT. Nuclei were stained with NucBlue™ Live ReadyProbes™ Reagent (Thermo  
562 Fisher Scientific, R37605) for 10 minutes in PBS. 3D confocal images corresponding  
563 to 12  $\mu$ m thick z-stacks of 4 stitched fields of views were collected on a Nikon A1R  
564 scanning confocal microscope using a Plan Apo NA 0.75 lens and x20  
565 magnification. FITC and Hoechst 33342 signals were respectively imaged with the  
566 488 nm and 405 nm laser lines. For each Z stack, images were combined into one  
567 focused image using Nikon Elements Extended Depth of focus (EDF) module that  
568 picks the focused regions from each frame and merges them together into a single  
569 focused image. The focused EDF images from different conditions were then  
570 analyzed with Bitplane Imaris software (version 9.2.0) using the cell segmentation  
571 module and intensity quantification. To specifically determine the cytoplasmic  
572 CellRox Green reagent intensity, the region corresponding to the Hoechst staining  
573 was excluded and FITC channel threshold was applied across all samples per given  
574 experiment. Mean cytosolic CellRox Green assay signal was then quantified per  
575 each individual cell and presented in the graph.

576 **Transmission Electron Microscopy.** Samples were fixed in modified Karnovsky's  
577 fixative (2% paraformaldehyde and 2.5% glutaraldehyde in 0.1M sodium cacodylate  
578 buffer, pH7.2) and then post-fixed in freshly prepared 1% aqueous potassium  
579 ferrocyanide- osmium tetroxide (EM Sciences, Hatfield, PA), for 2h followed by  
580 overnight incubation in 0.5% Uranyl acetate at 4<sup>0</sup>C. The samples were then  
581 dehydrated through ascending series of ethanol (50%, 70%, 90%, 100%) followed by  
582 propylene oxide (each step was for 15 min) and embedded in Eponate 12 (Ted Pella,  
583 Redding, CA). Ultrathin sections (80 nm) were cut with an Ultracut microtome (Leica),  
584 stained with 0.2% lead citrate and examined in a JEOL JEM-1400 transmission  
585 electron microscope (TEM) at 80kV. Digital images were captured with a GATAN  
586 Ultrascan 1000 CCD camera.

### 587 **Tandem Mass Tag proteomics**

588 **Protein Precipitation.** Protein concentration in the lysates were quantified using the  
589 Pierce micro-BCA assay (ThermoFisher Scientific, Waltham, MA). All protein from  
590 the cell lysates was precipitated with a combination of



591 methanol/chloroform/water(Wessel and Flügge, 1984). In brief, X volume of lysate  
592 was mixed with 4X volume of methanol followed by 2X volume of chloroform and 3X  
593 volume of water. The protein pellets were washed a total of three times with 5X  
594 volume of methanol. The protein pellets were air dried and resuspended in 8M urea,  
595 100mM EPPS pH 7.0, 5mM DTT. Proteins were alkylated with 15 mM N-  
596 ethylmaleimide (Sigma).

597 **LysC/Trypsin Digestion.** The protein in 8M urea was diluted to 4M with 100mM  
598 EPPS, pH 8.0. 15 mg of protein/sample was digested at 25 °C for 12 hours with lysyl  
599 endopeptidase (LysC, Wako Chemicals USA) at a 1:25; protein:protease ratio.  
600 Following LysC digestion the peptides in 4M urea were diluted to 1M urea with  
601 100mM EPPS, pH 8.0. The LysC peptides were digested with trypsin at 37 °C for 8  
602 hours (Promega) at a 1:50; protein:protease ratio.

603 **Ubiquitin Remnant Peptide Enrichment (KGG peptides).** Prior to KGG peptide  
604 enrichment, the tryptic peptides were acidified to 2% formic acid and desalted with 1  
605 g tC18 Sep-Pak cartridges (Waters). The desalted peptides were dried by vacuum.  
606 KGG peptide enrichment was performed with the PTMScan ubiquitin remnant motif  
607 kit (Cell Signaling Technologies, Kit#5562) as per the manufacturers protocol. KGG  
608 peptides eluted from the antibodies were dried by vacuum. The flow through peptides  
609 from the KGG enrichment were saved for phosphopeptide and total protein analysis.

610 **TMT labelling of KGG Peptides.** Peptides were resuspended in 200mM EPPS, pH  
611 8.0. 10 µL of TMT reagent at 20 µg/µL (ThermoFisher) was added to each sample.  
612 Peptides were incubated with TMT reagent for 3 hours at 25 °C. TMT-labeled  
613 peptides were quenched with hydroxylamine (0.5% final) and acidified with  
614 trifluoroacetic acid (2% final). The samples were combined, desalted with 50 mg tC18  
615 Sep-Paks, and dried by vacuum.

616 **Ubiquitin Remnant Peptide Fractionation.** TMT-labeled KGG peptides were  
617 fractionated using the high pH reversed-phase peptide fractionation kit  
618 (ThermoFisher). The dried KGG peptides were resuspended in 0.1% trifluoroacetic  
619 acid and fractionated according to the manufacturers protocol into 6 fractions (17.5%,  
620 20%, 22.5%, 25%, 30%, and 70% acetonitrile + 0.1% triethylamine). The KGG  
621 peptide fractions were dried by vacuum, desalted with StageTips packed with  
622 Empore C18 material (3M, Maplewood, MN.), and dried again by vacuum. KGG  
623 peptides were reconstituted in 5% formic acid + 5% acetonitrile for LC-MS3 analysis.

624 **TMT labelling of KGG Flow Through Peptides.** The flow through peptides from the  
625 KGG enrichment were labeled with TMT prior to phosphopeptide enrichment. The  
626 flow through peptides were resuspended in 1X IAP buffer from the ubiquitin remnant  
627 kit (from prior step). The pH of the resuspended peptides was adjusted by adding 1M  
628 EPPS, pH 8.0 in a 3:1 ratio (peptide volume:1M EPPS volume; 250mM EPPS final).  
629 2.1 mg of peptide from each sample was labeled with 2.4 mg of TMT reagent  
630 resuspended in 60  $\mu$ L, 100% acetonitrile. The peptides were incubated with TMT  
631 reagent for 3 hours at 25 °C. TMT-labeled peptides were quenched with  
632 hydroxylamine (0.5% final) and acidified with trifluoroacetic acid (2% final). The  
633 samples were combined, desalted with 1 g tC18 Sep-Paks, dried by vacuum.

634 **Phosphoserine, -threonine, -tyrosine Enrichment and Fractionation.**

635 Phosphotyrosine (pY) peptides were enriched using the Cell Signaling Technologies  
636 pY-1000 antibody kit as per the manufacturers protocol (Cell Signaling Technologies,  
637 Kit#8803). The flow through from the pY enrichment was desalted on a 1g tC18 Sep-  
638 Pak cartridge (Waters Corporation, Milford, MA) and dried by centrifugal evaporation  
639 and saved for phosphoserine and phosphothreonine (pST) analysis. pST  
640 phosphopeptides were enriched using the Pierce Fe-NTA phospho-enrichment kit  
641 (ThermoFisher). In brief, peptides were bound and washed as per manufacturers  
642 protocol. Phosphopeptides were eluted from the Fe-NTA resin with 50mM  $\text{HK}_2\text{PO}_4$   
643 pH 10.5. Labelled phosphopeptides were subjected to orthogonal basic-pH reverse  
644 phase fractionation on a 3x100 mm column packed with 1.9  $\mu$ m Poroshell C18  
645 material (Agilent, Santa Clara, CA), utilizing a 45 min linear gradient from 8% buffer A  
646 (5% acetonitrile in 10 mM ammonium bicarbonate, pH 8) to 30% buffer B (acetonitrile  
647 in 10mM ammonium bicarbonate, pH 8) at a flow rate of 0.4 ml/min. Ninety-six  
648 fractions were consolidated into 18 samples, acidified with formic acid and vacuum  
649 dried. The samples were resuspended in 0.1% trifluoroacetic acid, desalted on  
650 StageTips and vacuum dried. Peptides were reconstituted in 5% formic acid + 5%  
651 acetonitrile for LC-MS3 analysis. The flow-through peptides from the pST enrichment  
652 were saved for total protein analysis.

653 **Peptide Fractionation for Total Protein Analysis.** The flow-through from the pST  
654 enrichment was dried by centrifugal evaporation. The dried peptides were  
655 resuspended in 0.1% TFA. Approximately 250  $\mu$ g of peptide mix was subjected to  
656 orthogonal basic-pH reverse phase fractionation on a 3x100 mm column packed with  
657 1.9  $\mu$ m Poroshell C18 material (Agilent, Santa Clara, CA), utilizing a 45 min linear

658 gradient from 8% buffer A (5% acetonitrile in 10 mM ammonium bicarbonate, pH 8)  
659 to 35% buffer B (acetonitrile in 10mM ammonium bicarbonate, pH 8) at a flow rate of  
660 0.4 ml/min. Ninety-six fractions were consolidated into 12 samples, acidified with  
661 formic acid and vacuum dried. The samples were resuspended in 5% formic acid,  
662 desalted on StageTips and vacuum dried. Peptides were reconstituted in 5% formic  
663 acid + 5% acetonitrile for LC-MS3 analysis.

664 **Mass spectrometry analysis.** All mass spectra were acquired on an Orbitrap Fusion  
665 Lumos coupled to an EASY nanoLC-1000 (or nanoLC-1200) (ThermoFisher) liquid  
666 chromatography system. Approximately 2  $\mu$ g of peptides were loaded on a 75  $\mu$ m  
667 capillary column packed in-house with Sepax GP-C18 resin (1.8  $\mu$ m, 150 Å, Sepax  
668 Technologies) to a final length of 35 cm. Peptides for total protein analysis were  
669 separated using a 180-minute linear gradient from 8% to 23% acetonitrile in 0.1%  
670 formic acid. The mass spectrometer was operated in a data dependent mode. The  
671 scan sequence began with FTMS1 spectra (resolution = 120,000; mass range of  
672 350-1400  $m/z$ ; max injection time of 50 ms; AGC target of 1e6; dynamic exclusion for  
673 60 seconds with a +/- 10 ppm window). The ten most intense precursor ions were  
674 selected for ITMS2 analysis via collisional-induced dissociation (CID) in the ion trap  
675 (normalized collision energy (NCE) = 35; max injection time = 100ms; isolation  
676 window of 0.7 Da; AGC target of 2e4). Following ITMS2 acquisition, a synchronous-  
677 precursor-selection (SPS) MS3 spectrum was acquired by selecting and isolating up  
678 to 10 MS2 product ions for additional fragmentation via high energy collisional-  
679 induced dissociation (HCD) with analysis in the Orbitrap (NCE = 55; resolution =  
680 50,000; max injection time = 110 ms; AGC target of 1.5e5; isolation window at 1.2 Da  
681 for +2  $m/z$ , 1.0 Da for +3  $m/z$  or 0.8 Da for +4 to +6  $m/z$ ).

682 pY peptides were separated using a 180-minute linear gradient from 7% to  
683 26% acetonitrile in 0.1% formic acid. The mass spectrometer was operated in a data  
684 dependent mode. The scan sequence began with FTMS1 spectra (resolution =  
685 120,000; mass range of 350-1400  $m/z$ ; max injection time of 50 ms; AGC target of  
686 1e6; dynamic exclusion for 75 seconds with a +/- 10 ppm window). The ten most  
687 intense precursor ions were selected for FTMS2 analysis via collisional-induced  
688 dissociation (CID) in the ion trap (normalized collision energy (NCE) = 35; max  
689 injection time = 150ms; isolation window of 0.7 Da; AGC target of 3e4;  $m/z$  = 2-6;  
690 Orbitrap resolution = 15k). Following FTMS2 acquisition, a synchronous-precursor-  
691 selection (SPS) MS3 method was enabled to select five MS2 product ions for high

692 energy collisional-induced dissociation (HCD) with analysis in the Orbitrap (NCE =  
693 55; resolution = 50,000; max injection time = 300 ms; AGC target of 1e5; isolation  
694 window at 1.2 Da.

695 pST peptides were separated using a 120-minute linear gradient from 6% to  
696 26% acetonitrile in 0.1% formic acid. The mass spectrometer was operated in a data  
697 dependent mode. The scan sequence began with FTMS1 spectra (resolution =  
698 120,000; mass range of 350-1400  $m/z$ ; max injection time of 50 ms; AGC target of  
699 1e6; dynamic exclusion for 60 seconds with a +/- 10 ppm window). The ten most  
700 intense precursor ions were selected for ITMS2 analysis via collisional-induced  
701 dissociation (CID) in the ion trap (normalized collision energy (NCE) = 35; max  
702 injection time = 200ms; isolation window of 0.7 Da; AGC target of 2e4). Following  
703 MS2 acquisition, a synchronous-precursor-selection (SPS) MS3 method was enabled  
704 to select five MS2 product ions for high energy collisional-induced dissociation (HCD)  
705 with analysis in the Orbitrap (NCE = 55; resolution = 50,000; max injection time = 300  
706 ms; AGC target of 1e5; isolation window at 1.2 Da for +2  $m/z$ , 1.0 Da for +3  $m/z$  or  
707 0.8 Da for +4 to +6  $m/z$ ).

708 KGG peptides were separated using a 180-minute linear gradient from 7% to  
709 24% acetonitrile in 0.1% formic acid. The mass spectrometer was operated in a data  
710 dependent mode. The scan sequence began with FTMS1 spectra (resolution =  
711 120,000; mass range of 350-1400  $m/z$ ; max injection time of 50 ms; AGC target of  
712 1e6; dynamic exclusion for 75 seconds with a +/- 10 ppm window). The ten most  
713 intense precursor ions were selected for FTMS2 analysis via collisional-induced  
714 dissociation (CID) in the ion trap (normalized collision energy (NCE) = 35; max  
715 injection time = 100ms; isolation window of 0.7 Da; AGC target of 5e4;  $m/z$  3-6,  
716 Orbitrap resolution set to 15k). Following MS2 acquisition, a synchronous-precursor-  
717 selection (SPS) MS3 method was enabled to select 10 MS2 product ions for high  
718 energy collisional-induced dissociation (HCD) with analysis in the Orbitrap (NCE =  
719 55; resolution = 50,000; max injection time = 500 ms; AGC target of 1e5; isolation  
720 window at 1.0 Da for +3  $m/z$  or 0.8 Da for +4 to +6  $m/z$ ).

721 MS/MS spectra for the global proteome, serine/threonine phosphorylated,  
722 tyrosine phosphorylated, and ubiquitylated data sets were searched using the Mascot  
723 search algorithm (Matrix Sciences) against a concatenated target-decoy database  
724 comprised of the UniProt mouse and *Shigella flexneri* protein sequences (version  
725 2017\_08), known contaminants and the reversed versions of each sequence. For all

726 datasets a 50 ppm precursor ion mass tolerance was selected with tryptic specificity  
727 up to two missed cleavages. For the global proteome and serine/ threonine  
728 phosphorylated datasets a 0.8 Da fragment ion tolerance was selected. While for the  
729 tyrosine phosphorylated and KGG (ubiquitin) datasets a 0.02 Da fragment ion  
730 tolerance was selected. The global proteome and phosphorylated datasets used a  
731 fixed modification of N-ethylmaleimide on cysteine residues (+125.0477) as well as  
732 TMT 11-plex on Lysine and the peptide N-term (+229.1629). The ubiquitylated data  
733 set used a fixed modification of N-ethylmaleimide on cysteine residues (+125.0477)  
734 as well as TMT 11-plex on the peptide N-term (+229.1629). For variable  
735 modifications the global proteome dataset used methionine oxidation (+15.9949) as  
736 well as TMT 11-plex on tyrosine (+229.1629). The phosphorylated dataset used the  
737 same variable modifications as the global proteome dataset plus phosphorylation on  
738 serine, threonine, and tyrosine (+79.9663). Finally, the ubiquitylated dataset used  
739 methionine oxidation (+15.9949), TMT 11 plex on tyrosine and lysine (+229.1629), as  
740 well as TMT 11 Plex + ubiquitylation on lysine (343.2059). PSMs were filtered to a  
741 1% peptide FDR at the run level using linear discriminant analysis (LDA) (Kirkpatrick  
742 et al., 2013). PSM data within each plex and dataset (global proteome,  
743 phosphorylation, and ubiquitylation) was aggregated and these results were  
744 subsequently filtered to 2% protein FDR. For PSMs passing the peptide and protein  
745 FDR filters within the phosphorylated and ubiquitylated datasets, phosphorylation  
746 and ubiquitylation site localization was assessed using a modified version of the  
747 AScore algorithm(Beausoleil et al., 2006) and reassigned accordingly. Finally,  
748 reporter ion intensity values were determined for each dataset and plex using the  
749 Mojave algorithm(Zhuang et al., 2013) with an isolation width of 0.7.

750 **Quantification and statistical testing of global proteomics and**  
751 **phosphoproteomic data.** Quantification and statistical testing of global proteomics  
752 data were performed by MSstatsTMT v1.2.7, an open-source R/Bioconductor  
753 package(Huang et al., 2020; Tsai et al., 2020). MSstatsTMT was used to create  
754 quantification reports and statistical testing reports using the Peptide Spectrum  
755 Matches (PSM) as described above. First, PSMs were filtered out if they were (1)  
756 from decoy proteins; (2) from peptides with length less than 7; (3) with isolation  
757 specificity less than 70%; (4) with reporter ion intensity less than  $2^8$  noise estimate;  
758 (5) from peptides shared by more than one protein; (6) with summed reporter ion  
759 intensity (across all eleven channels) lower than 30,000; (7) with missing values in



760 more than nine channels. In the case of redundant PSMs (i.e., multiple PSMs in one  
761 MS run corresponding to the same peptide ion), only the single PSM with the least  
762 missing values or highest isolation specificity or highest maximal reporter ion  
763 intensity was retained for subsequent analysis. Multiple fractions from the same TMT  
764 mixture were combined in MSstatsTMT. In particular, if the same peptide ion was  
765 identified in multiple fractions, only the single fraction with the highest mean or  
766 maximal reporter ion intensity was kept. Next, MSstatsTMT generated a normalized  
767 quantification report across all the samples at the protein level from the processed  
768 PSM report. Global median normalization, which equalized the median of the reporter  
769 ion intensities across all the channels and TMT mixtures, was carried out to reduce  
770 the systematic bias between channels. The normalized reporter ion intensities of all  
771 the peptide ions mapped to a protein were summarized into a single protein level  
772 intensity in each channel and TMT mixture. For each protein, additional local  
773 normalization on the summaries was performed to reduce the systematic bias  
774 between different TMT mixtures. For the local normalization, we created an artifact  
775 reference channel by averaging over all the channels except 131C for each protein  
776 and TMT mixture. The channel 131C was removed in order to make each mixture  
777 have the same number of samples from each condition. The normalized  
778 quantification report at the protein level is available in Supplementary Table 6. As a  
779 final step, the differential abundance analysis between conditions was performed in  
780 MSstatsTMT based on a linear mixed-effects model per protein. The inference  
781 procedure was adjusted by applying an empirical Bayes shrinkage. The table with the  
782 statistical testing results for all the proteins is available as in Supplementary Table 7.  
783 Quantification and statistical testing for phospho- and KGG (Ub) site data were  
784 performed by the same procedure as for global proteomics data with some  
785 modifications. First, PSMs from non-modified peptides were filtered out from the PSM  
786 report and the remaining preprocessing analyses were the same as above. Second,  
787 custom PTM site identifiers were created for each PSM by identifying the modified  
788 residue index in the reference proteome that was used to search the MS/MS spectra.  
789 Finally, all steps for quantification and differential abundance analysis were  
790 performed at the PTM site level, rather than the protein level (Supplementary Tables  
791 8 and 9). The relative abundance of TMT reporter ion abundances in bar graphs  
792 throughout the paper stems from MSstats modeling and sums up to 1.0 for each  
793 Plex. Thus, the sum of all signal shown sums to 1.0 or 2.0 depending on whether the

794 feature was quantified in one or both plexes. For the consolidated heatmaps showing  
795 proteome level changes immediately adjacent to any identified PTMs, the  
796 ComplexHeatmap R package was used.

797 **Gene set enrichment analysis.** Gene set enrichment analysis was performed using  
798 MsigDB(Liberzon et al., 2015; Subramanian et al., 2005). Global proteome data were  
799 filtered to include features with an absolute value log<sub>2</sub>fc values of greater than 1 as  
800 well as p values of less than 0.05. Subsequently the data were filtered to require that  
801 every protein must be found in both multiplexed experiments. UniProt identifiers were  
802 transformed to gene symbols and fed into GSEA for an enrichment analysis against  
803 MsigDB's hallmark gene sets. Gene set enrichment results were filtered to 5% FDR.

804 **Overview Heatmaps/Clustering.** For the overview heatmaps showing PTM and  
805 global proteome datasets side by side, clustering was performed as follows. First,  
806 protein quantification results from MSstatsTMT for the PTM and global proteome  
807 datasets were merged with the phospho-proteome and KGG datasets, respectively.  
808 For each of the two combined datasets, the pheatmap R package was used to  
809 cluster the protein model results into 16 row wise clusters using the clustering  
810 method 'ward.D'. The columns of the dataset were kept static and not clustered.

811 **Statistical analysis.** Pairwise statistical analyses were performed using an unpaired  
812 t-test using two-stage step-up method of Benjamini, Krieger and Yekutieli and false  
813 discovery rate of 1% to determine if the values in two sets of data differ. Multiple-  
814 comparison corrections were made using the Sidak method with family-wise  
815 significance and confidence level of 0.05. Analysis of *in vivo* infection data was done  
816 using unpaired two-tailed t-test after outliers were removed using ROUT method (Q =  
817 1 %). Analysis of kinetic (time) with Erastin was performed using two-way ANOVA  
818 followed by multiple comparison testing. Line graphs and associated data points  
819 represent means of data; error bars represent standard deviation from mean.  
820 GraphPad Prism 8 software was used for data analysis and representation. P-values:  
821 \*<0.05, \*\*<0.01, \*\*\*<0.001, \*\*\*\*<0.0001. For proteomics data, differential abundance  
822 analysis between conditions and p-values were determined based on a linear mixed-  
823 effects model per protein (global proteome data) or per PTM site (Phosphorylation,  
824 Ubiquitin-KGG data) using MSstatsTMT software package.

825 **Data availability.** Mass spectrometry raw files have been uploaded to the UCSD  
826 MassIVE repository and are available:

827 (<https://massive.ucsd.edu/ProteoSAFe/dataset.jsp?accession=MSV000085565>;  
828 Password= shigella).

829 **Software Availability.** Raw files were converted to mzXML using ReadW (v 4.3.1)  
830 available  
831 through [https://sourceforge.net/projects/sashimi/files/ReAdW%20%28Xcalibur%20co  
832 nverter%29/](https://sourceforge.net/projects/sashimi/files/ReAdW%20%28Xcalibur%20converter%29/). Spectra were searched using Mascot (v 2.4.1) licensed from Matrix  
833 Sciences. Search results were filtered using the LDA function in the MASS Package  
834 in R as described in Huttlin et al. Cell 143, 1147-1189 (2010). Mojave is an in-house  
835 tool developed to report TMT reporter ion intensity values and is available upon  
836 request. MSstatsTMT (v 1.2.7) is a freely available open-source R/Bioconductor  
837 package to detect differentially abundant proteins in TMT experiments. It can be  
838 installed  
839 through <https://www.bioconductor.org/packages/release/bioc/html/MSstatsTMT.html>.

840 Gene set enrichment was performed using the GSEA/MSigDB web  
841 portal <https://www.gsea-msigdb.org/gsea/msigdb/annotate.jsp>. Heatmaps were  
842 generated using the pheatmap (v1.0.12) ([https://cran.r-  
843 project.org/web/packages/pheatmap/index.html](https://cran.r-project.org/web/packages/pheatmap/index.html)) or ComplexHeatmap (v 2.4.2)  
844 (<https://bioconductor.org/packages/release/bioc/html/ComplexHeatmap.html>) R  
845 packages.

## 846 **References**

- 847 Ashida, H., Mimuro, H., and Sasakawa, C. (2015). Shigella Manipulates Host Immune  
848 Responses by Delivering Effector Proteins with Specific Roles. *Front. Immunol.* 6.
- 849 Bauckman, K.A., Owusu-Boaitey, N., and Mysorekar, I.U. (2015). Selective autophagy:  
850 Xenophagy. *Methods* 75, 120–127.
- 851 Beausoleil, S.A., Villén, J., Gerber, S.A., Rush, J., and Gygi, S.P. (2006). A probability-based  
852 approach for high-throughput protein phosphorylation analysis and site localization. *Nat.*  
853 *Biotechnol.* 24, 1285–1292.
- 854 Bingol, B., Tea, J.S., Phu, L., Reichelt, M., Bakalarski, C.E., Song, Q., Foreman, O., Kirkpatrick,  
855 D.S., and Sheng, M. (2014). The mitochondrial deubiquitinase USP30 opposes parkin-  
856 mediated mitophagy. *Nature* 510, 370–375.
- 857 Birmingham, C.L., Smith, A.C., Bakowski, M.A., Yoshimori, T., and Brumell, J.H. (2006).  
858 Autophagy Controls Salmonella Infection in Response to Damage to the Salmonella-  
859 containing Vacuole. *J. Biol. Chem.* 281, 11374–11383.
- 860 Cadwell, K., Patel, K.K., Maloney, N.S., Liu, T.-C., Ng, A.C.Y., Storer, C.E., Head, R.D., Xavier, R.,  
861 Stappenbeck, T.S., and Virgin, H.W. (2010). Virus-Plus-Susceptibility Gene Interaction  
862 Determines Crohn’s Disease Gene Atg16L1 Phenotypes in Intestine. *Cell* 141, 1135–1145.
- 863 Campbell-Valois, F.-X., Sachse, M., Sansonetti, P.J., and Parsot, C. (2015). Escape of Actively  
864 Secreting Shigella flexneri from ATG8/LC3-Positive Vacuoles Formed during Cell-To-Cell  
865 Spread Is Facilitated by IcsB and VirA. *MBio* 6.
- 866 Choi, S.-W., Park, H.-H., Kim, S., Chung, J.M., Noh, H.-J., Kim, S.K., Song, H.K., Lee, C.-W.,  
867 Morgan, M.J., Kang, H.C., et al. (2018). PELL1 Selectively Targets Kinase-Active RIP3 for  
868 Ubiquitylation-Dependent Proteasomal Degradation. *Mol. Cell* 70, 920-935.e7.
- 869 Choy, A., Dancourt, J., Mugo, B., O’Connor, T.J., Isberg, R.R., Melia, T.J., and Roy, C.R. (2012).  
870 The Legionella Effector RavZ Inhibits Host Autophagy Through Irreversible Atg8  
871 Deconjugation. *Science* 338, 1072–1076.
- 872 Conrad, M., and Sato, H. (2012). The oxidative stress-inducible cystine/glutamate antiporter,  
873 system x<sub>c</sub><sup>-</sup>: cystine  
874 supplier and beyond. *Amino Acids* 42, 231–246.
- 875 Cunha, L.D., Yang, M., Carter, R., Guy, C., Harris, L., Crawford, J.C., Quarato, G., Boada-  
876 Romero, E., Kalkavan, H., Johnson, M.D.L., et al. (2018). LC3-Associated Phagocytosis in  
877 Myeloid Cells Promotes Tumor Immune Tolerance. *Cell* 175, 429-441.e16.
- 878 DeVorkin, L., Pavey, N., Carleton, G., Comber, A., Ho, C., Lim, J., McNamara, E., Huang, H.,  
879 Kim, P., Zacharias, L.G., et al. (2019). Autophagy Regulation of Metabolism Is Required for  
880 CD8+ T Cell Anti-tumor Immunity. *Cell Rep.* 27, 502-513.e5.
- 881 Dixon, S.J., Lemberg, K.M., Lamprecht, M.R., Skouta, R., Zaitsev, E.M., Gleason, C.E., Patel,  
882 D.N., Bauer, A.J., Cantley, A.M., Yang, W.S., et al. (2012). Ferroptosis: an iron-dependent  
883 form of nonapoptotic cell death. *Cell* 149, 1060–1072.

- 884 Dong, N., Zhu, Y., Lu, Q., Hu, L., Zheng, Y., and Shao, F. (2012). Structurally Distinct Bacterial  
885 TBC-like GAPs Link Arf GTPase to Rab1 Inactivation to Counteract Host Defenses. *Cell* *150*,  
886 1029–1041.
- 887 Fujita, N., Morita, E., Itoh, T., Tanaka, A., Nakaoka, M., Osada, Y., Umemoto, T., Saitoh, T.,  
888 Nakatogawa, H., Kobayashi, S., et al. (2013). Recruitment of the autophagic machinery to  
889 endosomes during infection is mediated by ubiquitin. *J. Cell Biol.* *203*, 115–128.
- 890 Gao, L., Coope, H., Grant, S., Ma, A., Ley, S.C., and Harhaj, E.W. (2011). ABIN1 Protein  
891 Cooperates with TAX1BP1 and A20 Proteins to Inhibit Antiviral Signaling. *J. Biol. Chem.* *286*,  
892 36592–36602.
- 893 Hampe, J., Franke, A., Rosenstiel, P., Till, A., Teuber, M., Huse, K., Albrecht, M., Mayr, G.,  
894 Vega, F.M.D.L., Briggs, J., et al. (2007). A genome-wide association scan of nonsynonymous  
895 SNPs identifies a susceptibility variant for Crohn disease in ATG16L1. *Nat. Genet.* *39*, 207–  
896 211.
- 897 Huang, J., and Brumell, J.H. (2014). Bacteria-autophagy interplay: a battle for survival. *Nat.*  
898 *Rev. Microbiol.* *12*, 101–114.
- 899 Huang, T., Choi, M., Hao, S., and Vitek, O. (2020). MSstatsTMT: Protein Significance Analysis  
900 in shotgun mass spectrometry-based proteomic experiments with tandem mass tag (TMT)  
901 labeling (Bioconductor version: Release (3.11)).
- 902 Hubbard-Lucey, V.M., Shono, Y., Maurer, K., West, M.L., Singer, N.V., Ziegler, C.G.K.,  
903 Lezcano, C., Motta, A.C.F., Schmid, K., Levi, S.M., et al. (2014). Autophagy Gene Atg16l1  
904 Prevents Lethal T Cell Alloreactivity Mediated by Dendritic Cells. *Immunity* *41*, 579–591.
- 905 Kirkpatrick, D.S., Bustos, D.J., Dogan, T., Chan, J., Phu, L., Young, A., Friedman, L.S., Belvin,  
906 M., Song, Q., Bakalarski, C.E., et al. (2013). Phosphoproteomic characterization of DNA  
907 damage response in melanoma cells following MEK/PI3K dual inhibition. *Proc. Natl. Acad.*  
908 *Sci.* *110*, 19426–19431.
- 909 Koch, A., Yoon, Y., Bonekamp, N.A., McNiven, M.A., and Schrader, M. (2005). A role for Fis1  
910 in both mitochondrial and peroxisomal fission in mammalian cells. *Mol. Biol. Cell* *16*, 5077–  
911 5086.
- 912 Lapek, J.D., Greninger, P., Morris, R., Amzallag, A., Pruteanu-Malinici, I., Benes, C.H., and  
913 Haas, W. (2017). Detection of dysregulated protein-association networks by high-throughput  
914 proteomics predicts cancer vulnerabilities. *Nat. Biotechnol.* *35*, 983–989.
- 915 Lassen, K.G., Kuballa, P., Conway, K.L., Patel, K.K., Becker, C.E., Peloquin, J.M., Villablanca,  
916 E.J., Norman, J.M., Liu, T.-C., Heath, R.J., et al. (2014). Atg16L1 T300A variant decreases  
917 selective autophagy resulting in altered cytokine signaling and decreased antibacterial  
918 defense. *Proc. Natl. Acad. Sci.* *111*, 7741–7746.
- 919 Lee, S., Tumolo, J.M., Ehlinger, A.C., Jernigan, K.K., Qualls-Histed, S.J., Hsu, P.-C., McDonald,  
920 W.H., Chazin, W.J., and MacGurn, J.A. (2017). Ubiquitin turnover and endocytic trafficking in  
921 yeast are regulated by Ser57 phosphorylation of ubiquitin. *ELife* *6*, e29176.



- 922 Li, P., Jiang, W., Yu, Q., Liu, W., Zhou, P., Li, J., Xu, J., Xu, B., Wang, F., and Shao, F. (2017).  
923 Ubiquitination and degradation of GBPs by a *Shigella* effector to suppress host defence.  
924 *Nature* 551, 378–383.
- 925 Liberzon, A., Birger, C., Thorvaldsdóttir, H., Ghandi, M., Mesirov, J.P., and Tamayo, P. (2015).  
926 The Molecular Signatures Database (MSigDB) hallmark gene set collection. *Cell Syst.* 1, 417–  
927 425.
- 928 Lim, J., Park, H., Heisler, J., Maculins, T., Roose-Girma, M., Xu, M., Mckenzie, B., van  
929 Lookeren Campagne, M., Newton, K., and Murthy, A. (2019). Autophagy regulates  
930 inflammatory programmed cell death via turnover of RHIM-domain proteins. *ELife* 8.
- 931 Liu, W., Zhou, Y., Peng, T., Zhou, P., Ding, X., Li, Z., Zhong, H., Xu, Y., Chen, S., Hang, H.C., et  
932 al. (2018). N  $\epsilon$ -fatty acylation of multiple membrane-associated proteins by *Shigella* IcsB  
933 effector to modulate host function. *Nat. Microbiol.* 3, 996–1009.
- 934 Maloy, K.J., and Powrie, F. (2011). Intestinal homeostasis and its breakdown in inflammatory  
935 bowel disease. *Nature* 474, 298–306.
- 936 Marchiando, A.M., Ramanan, D., Ding, Y., Gomez, L.E., Hubbard-Lucey, V.M., Maurer, K.,  
937 Wang, C., Ziel, J.W., van Rooijen, N., Nuñez, G., et al. (2013). A deficiency in the autophagy  
938 gene Atg16L1 enhances resistance to enteric bacterial infection. *Cell Host Microbe* 14, 216–  
939 224.
- 940 Martin, P.K., Marchiando, A., Xu, R., Rudensky, E., Yeung, F., Schuster, S.L., Kernbauer, E.,  
941 and Cadwell, K. (2018). Autophagy proteins suppress protective type I interferon signalling in  
942 response to the murine gut microbiota. *Nat. Microbiol.* 3, 1131–1141.
- 943 Matsuzawa-Ishimoto, Y., Shono, Y., Gomez, L.E., Hubbard-Lucey, V.M., Cammer, M., Neil, J.,  
944 Dewan, M.Z., Lieberman, S.R., Lazrak, A., Marinis, J.M., et al. (2017). Autophagy protein  
945 ATG16L1 prevents necroptosis in the intestinal epithelium. *J. Exp. Med.* 214, 3687–3705.
- 946 McAlister, G.C., Nusinow, D.P., Jedrychowski, M.P., Wühr, M., Huttlin, E.L., Erickson, B.K.,  
947 Rad, R., Haas, W., and Gygi, S.P. (2014). MultiNotch MS3 enables accurate, sensitive, and  
948 multiplexed detection of differential expression across cancer cell line proteomes. *Anal.*  
949 *Chem.* 86, 7150–7158.
- 950 Mostowy, S., Bonazzi, M., Hamon, M.A., Tham, T.N., Mallet, A., Lelek, M., Gouin, E.,  
951 Demangel, C., Brosch, R., Zimmer, C., et al. (2010). Entrapment of intracytosolic bacteria by  
952 septin cage-like structures. *Cell Host Microbe* 8, 433–444.
- 953 Murthy, A., Li, Y., Peng, I., Reichelt, M., Katakam, A.K., Noubade, R., Roose-Girma, M.,  
954 DeVoss, J., Diehl, L., Graham, R.R., et al. (2014). A Crohn's disease variant in Atg16l1  
955 enhances its degradation by caspase 3. *Nature* 506, 456–462.
- 956 Ogawa, M., Yoshimori, T., Suzuki, T., Sagara, H., Mizushima, N., and Sasakawa, C. (2005).  
957 Escape of Intracellular *Shigella* from Autophagy. *Science* 307, 727–731.
- 958 Orvedahl, A., McAllaster, M.R., Sansone, A., Dunlap, B.F., Desai, C., Wang, Y.-T., Balce, D.R.,  
959 Luke, C.J., Lee, S., Orchard, R.C., et al. (2019). Autophagy genes in myeloid cells counteract

- 960 IFN $\gamma$ -induced TNF-mediated cell death and fatal TNF-induced shock. *Proc. Natl. Acad. Sci. U.*  
961 *S. A.* *116*, 16497–16506.
- 962 Parvatiyar, K., Barber, G.N., and Harhaj, E.W. (2010). TAX1BP1 and A20 Inhibit Antiviral  
963 Signaling by Targeting TBK1-IKKi Kinases. *J. Biol. Chem.* *285*, 14999–15009.
- 964 Peng, J., Schwartz, D., Elias, J.E., Thoreen, C.C., Cheng, D., Marsischky, G., Roelofs, J., Finley,  
965 D., and Gygi, S.P. (2003). A proteomics approach to understanding protein ubiquitination.  
966 *Nat. Biotechnol.* *21*, 921–926.
- 967 Rioux, J.D., Xavier, R.J., Taylor, K.D., Silverberg, M.S., Goyette, P., Huett, A., Green, T.,  
968 Kuballa, P., Barmada, M.M., Datta, L.W., et al. (2007). Genome-wide association study  
969 identifies new susceptibility loci for Crohn disease and implicates autophagy in disease  
970 pathogenesis. *Nat. Genet.* *39*, 596–604.
- 971 Rose, C.M., Isasa, M., Ordureau, A., Prado, M.A., Beausoleil, S.A., Jedrychowski, M.P., Finley,  
972 D.J., Harper, J.W., and Gygi, S.P. (2016). Highly Multiplexed Quantitative Mass Spectrometry  
973 Analysis of Ubiquitylomes. *Cell Syst.* *3*, 395-403.e4.
- 974 Saitoh, T., Fujita, N., Jang, M.H., Uematsu, S., Yang, B.-G., Satoh, T., Omori, H., Noda, T.,  
975 Yamamoto, N., Komatsu, M., et al. (2008). Loss of the autophagy protein Atg16L1 enhances  
976 endotoxin-induced IL-1 $\beta$  production. *Nature* *456*, 264–268.
- 977 Samie, M., Lim, J., Verschuere, E., Baughman, J.M., Peng, I., Wong, A., Kwon, Y.,  
978 Senbabaoglu, Y., Hackney, J.A., Keir, M., et al. (2018). Selective autophagy of the adaptor  
979 TRIF regulates innate inflammatory signaling. *Nat. Immunol.* *19*, 246–254.
- 980 Sato, H., Tamba, M., Ishii, T., and Bannai, S. (1999). Cloning and Expression of a Plasma  
981 Membrane Cystine/Glutamate Exchange Transporter Composed of Two Distinct Proteins. *J.*  
982 *Biol. Chem.* *274*, 11455–11458.
- 983 Shembade, N., Pujari, R., Harhaj, N.S., Abbott, D.W., and Harhaj, E.W. (2011). The kinase  
984 IKK $\alpha$  inhibits activation of the transcription factor NF- $\kappa$ B by phosphorylating the regulatory  
985 molecule TAX1BP1. *Nat. Immunol.* *12*, 834–843.
- 986 Sidik, S., Kottwitz, H., Benjamin, J., Ryu, J., Jarrar, A., Garduno, R., and Rohde, J.R. (2014). A  
987 *Shigella flexneri* Virulence Plasmid Encoded Factor Controls Production of Outer Membrane  
988 Vesicles. *G3 Genes Genomes Genet.* *4*, 2493–2503.
- 989 Stolz, A., Ernst, A., and Dikic, I. (2014). Cargo recognition and trafficking in selective  
990 autophagy. *Nat. Cell Biol.* *16*, 495–501.
- 991 Subramanian, A., Tamayo, P., Mootha, V.K., Mukherjee, S., Ebert, B.L., Gillette, M.A.,  
992 Paulovich, A., Pomeroy, S.L., Golub, T.R., Lander, E.S., et al. (2005). Gene set enrichment  
993 analysis: a knowledge-based approach for interpreting genome-wide expression profiles.  
994 *Proc. Natl. Acad. Sci. U. S. A.* *102*, 15545–15550.
- 995 Tal, M.C., Sasai, M., Lee, H.K., Yordy, B., Shadel, G.S., and Iwasaki, A. (2009). Absence of  
996 autophagy results in reactive oxygen species-dependent amplification of RLR signaling. *Proc.*  
997 *Natl. Acad. Sci.* *106*, 2770–2775.

- 998 Thurston, T.L.M., Wandel, M.P., Muhlinen, N. von, Foeglein, Á., and Randow, F. (2012).  
999 Galectin 8 targets damaged vesicles for autophagy to defend cells against bacterial invasion.  
1000 *Nature* 482, 414–418.
- 1001 Ting, L., Rad, R., Gygi, S.P., and Haas, W. (2011). MS3 eliminates ratio distortion in isobaric  
1002 multiplexed quantitative proteomics. *Nat. Methods* 8, 937–940.
- 1003 Tokunaga, F., Sakata, S., Saeki, Y., Satomi, Y., Kirisako, T., Kamei, K., Nakagawa, T., Kato, M.,  
1004 Murata, S., Yamaoka, S., et al. (2009). Involvement of linear polyubiquitylation of NEMO in  
1005 NF-kappaB activation. *Nat. Cell Biol.* 11, 123–132.
- 1006 Tsai, T.-H., Choi, M., Banfai, B., Liu, Y., MacLean, B., Dunkley, T., and Vitek, O. (2020).  
1007 Selection of features with consistent profiles improves relative protein quantification in  
1008 mass spectrometry experiments. *Mol. Cell. Proteomics MCP*.
- 1009 Wandel, M.P., Pathe, C., Werner, E.I., Ellison, C.J., Boyle, K.B., von der Malsburg, A., Rohde,  
1010 J., and Randow, F. (2017). GBPs Inhibit Motility of *Shigella flexneri* but Are Targeted for  
1011 Degradation by the Bacterial Ubiquitin Ligase IpaH9.8. *Cell Host Microbe* 22, 507-518.e5.
- 1012 Wang, C., Bauckman, K.A., Ross, A.S.B., Symington, J.W., Ligon, M.M., Scholtes, G., Kumar,  
1013 A., Chang, H.-W., Twentyman, J., Fashemi, B.E., et al. (2019). A non-canonical autophagy-  
1014 dependent role of the ATG16L1T300A variant in urothelial vesicular trafficking and  
1015 uropathogenic *Escherichia coli* persistence. *Autophagy* 15, 527–542.
- 1016 Wang, W., Hu, Y., Wang, X., Wang, Q., and Deng, H. (2018). ROS-Mediated 15-  
1017 Hydroxyprostaglandin Dehydrogenase Degradation via Cysteine Oxidation Promotes NAD<sup>+</sup>-  
1018 Mediated Epithelial-Mesenchymal Transition. *Cell Chem. Biol.* 25, 255-261.e4.
- 1019 Wang, Y.-T., Zaitsev, K., Lu, Q., Li, S., Schaiff, W.T., Kim, K.-W., Droit, L., Wilen, C.B., Desai, C.,  
1020 Balce, D.R., et al. (2020). Select autophagy genes maintain quiescence of tissue-resident  
1021 macrophages and increase susceptibility to *Listeria monocytogenes*. *Nat. Microbiol.* 5, 272–  
1022 281.
- 1023 Wessel, D., and Flüggé, U.I. (1984). A method for the quantitative recovery of protein in  
1024 dilute solution in the presence of detergents and lipids. *Anal. Biochem.* 138, 141–143.
- 1025 Xu, D., Li, X., Shao, F., Lv, G., Lv, H., Lee, J.-H., Qian, X., Wang, Z., Xia, Y., Du, L., et al. (2019a).  
1026 The protein kinase activity of fructokinase A specifies the antioxidant responses of tumor  
1027 cells by phosphorylating p62. *Sci. Adv.* 5, eaav4570.
- 1028 Xu, Y., Zhou, P., Cheng, S., Lu, Q., Nowak, K., Hopp, A.-K., Li, L., Shi, X., Zhou, Z., Gao, W., et  
1029 al. (2019b). A Bacterial Effector Reveals the V-ATPase-ATG16L1 Axis that Initiates  
1030 Xenophagy. *Cell* 178, 552-566.e20.
- 1031 Zhang, Q., Wu, J., Wu, R., Ma, J., Du, G., Jiao, R., Tian, Y., Zheng, Z., and Yuan, Z. (2012). DJ-1  
1032 promotes the proteasomal degradation of Fis1: implications of DJ-1 in neuronal protection.  
1033 *Biochem. J.* 447, 261–269.

1034 Zhuang, G., Yu, K., Jiang, Z., Chung, A., Yao, J., Ha, C., Toy, K., Soriano, R., Haley, B.,  
1035 Blackwood, E., et al. (2013). Phosphoproteomic analysis implicates the mTORC2-FoxO1 axis  
1036 in VEGF signaling and feedback activation of receptor tyrosine kinases. *Sci. Signal.* 6, ra25.

1037

### 1038 **Funding**

1039 This work was funded in parts by a fellowship awarded to T.M. by the AXA  
1040 Research fund (16-AXA-PDOC-078) and the Genentech Visiting Scientist Program.

1041

### 1042 **Acknowledgements**

1043 We thank Avinashnarayan Venkatanarayan and the laboratory of Eric Brown  
1044 at Genentech for technical assistance.

1045

### 1046 **Author contributions**

1047 T.M., I.D., D.S.K. and A.M. designed the conceptual framework of the study  
1048 and experiments. T.M. designed and performed large-scale proteomic experiments  
1049 with assistance from J.L. and guidance from I.D., D.S.K. and A.M. TMT data  
1050 acquisition and initial data analysis performed by R.C.K., B.K.E., T.H., M.C., T-H. T.  
1051 and O.V. TMT data analysis and representation performed by T.H., E.V. and D.S.K.  
1052 with input from T.M. and A.M. Electron microscopy performed by A.K.K. and M.R.  
1053 CellRox microscopy experiments performed by T.M., P.C. and C.C. *In vitro* BMDM  
1054 infection assays performed by T.M. *In vivo* infection experiments performed by T.M.  
1055 and A.M. J.R. provided bacterial strains and guided the infection studies. The  
1056 manuscript was written by T.M. D.S.K. and A.M with contributions and comments  
1057 from all authors.

1058

### 1059 **Competing interests**

1060 T.M., T.H., P.C., C.C., J.L., A.K.K., M.R., D.S.K. and A.M. are current  
1061 employees of Genentech Inc. and shareholders in Roche. I.D. is a current employee  
1062 of Fraunhofer Institutes, CEO and co-founder of Vivlion GmbH, and co-founder of  
1063 Caraway Therapeutics. R.C.K. and B.K.E. are current employees of IQ Proteomics  
1064 LLC. E.V. is a current employee at Galapagos.

1065 **Supplemental Figures and Tables**

**Supplemental Figure 1. Quality control and PTM-Global comparative analysis of proteomics data.**

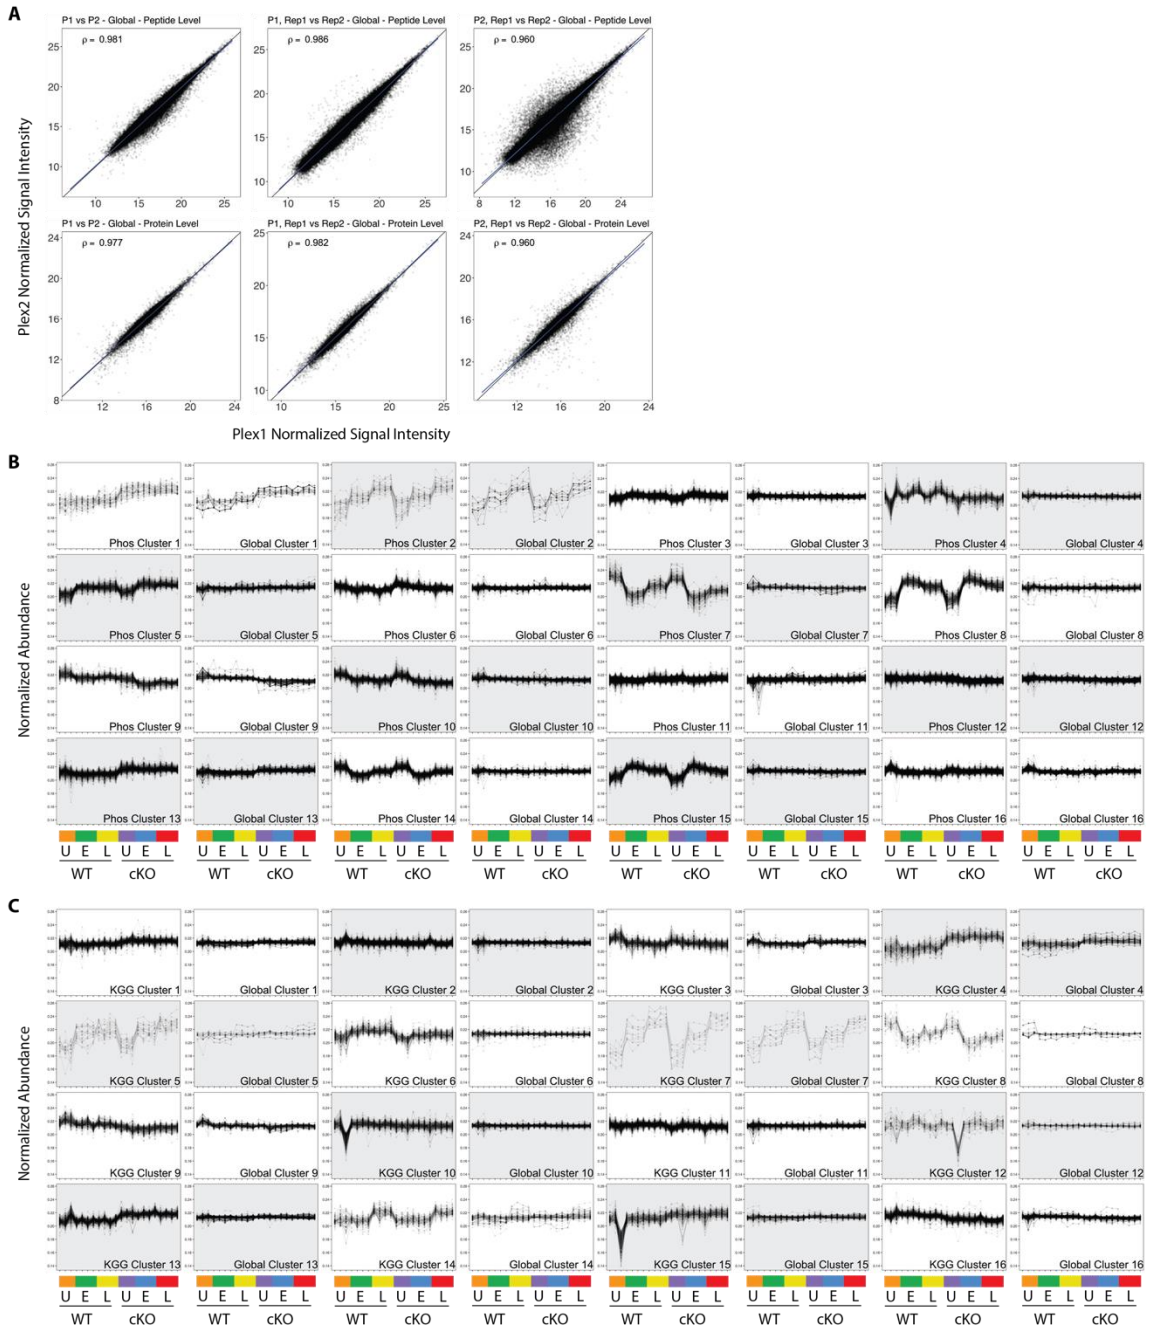

(A) Scatterplots showing normalized signal intensity from the Global Proteome analysis. Peptide (upper row) and protein (lower row) level data stemming from MSstats modeling are displayed. Plots in the first column compare Plex 1 versus Plex 2, where data from intra-plex duplicates was aggregated during modeling. Plots in the middle and right columns compare intra-plex duplicate samples within Plex1 (middle) or Plex2 (right). Pearson correlations are shown for each contrast. (B and C) Line plots showing all 16 K-means clusters corresponding to the Phospho-Global (B) and KGG (Ub)-Global (C) heatmaps displayed in Figure 2. The background shading for each pair of line plots is toggled to highlight pairing between Phos/KGG and Global protein clusters.

1066



**Supplemental Figure 2. A global overview of changes identified between the genotypes and upon infection.**

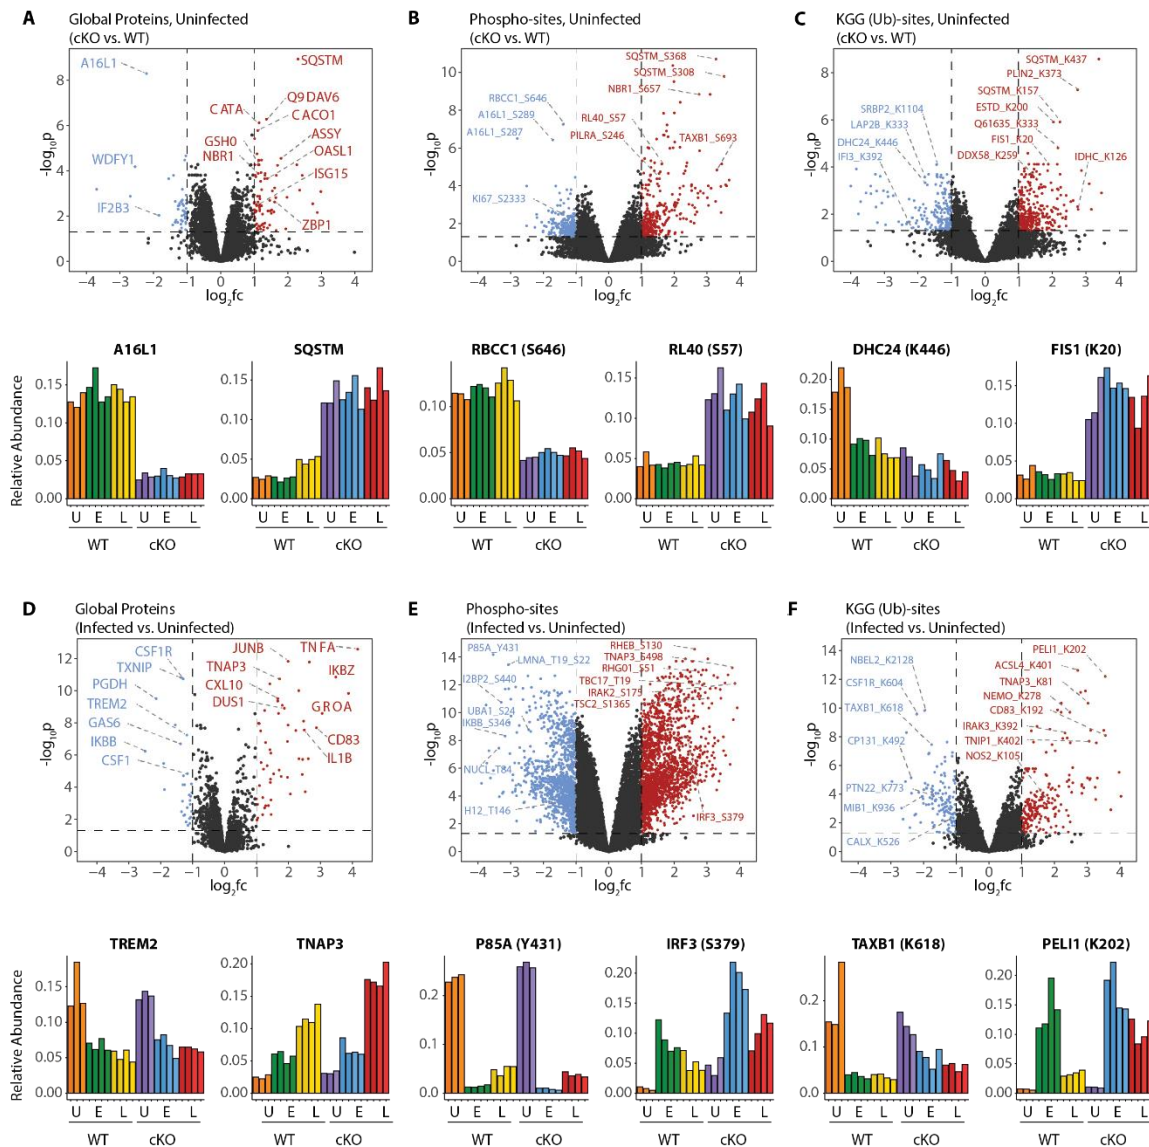

(A-C) Volcano plots showing differential expression of Global Proteins (A), Phospho-sites (B) and KGG (Ub)-sites (C) between uninfected cKO vs. WT BMDMs. Volcano plots display  $\log_2$  fold changes and  $-\log_{10}$  transformed p-values for the host proteome. Bar graphs at the bottom of each panel represent top hits with positive and negative  $\log_2$  fold changes. Uninfected (U) samples are shown with orange (WT) and purple (cKO), early infection (E) in green (WT) and blue (cKO) and late infection in yellow (WT) and red (cKO), respectively. Protein names are shown as UniProt identifiers with modification sites indicated by the modified amino acid (S/T/Y/K) and residue number (e.g. RL40\_S57). Features enriched in cKO and WT BMDMs are highlighted in red and blue, respectively. (D-F) Volcano plots displaying differentially expressed Global Proteins (D), Phospho-sites (E) and KGG (Ub)-sites (F) between infected and uninfected BMDMs. Infected refers to the aggregate condition in which early (E) and late (L) infected samples for WT and cKO are each weighted as 0.25 relative to 0.5 each for the WT and cKO uninfected samples. Features enriched in infected and uninfected BMDMs are highlighted in red and blue, respectively. As above, bar graphs below each panel show example hits. The relative abundance of TMT reporter ions sums up to 2.0 for features quantified in both Plex1 and Plex2.

**Supplemental Figure 3. Dynamic macrophage response to infection.**

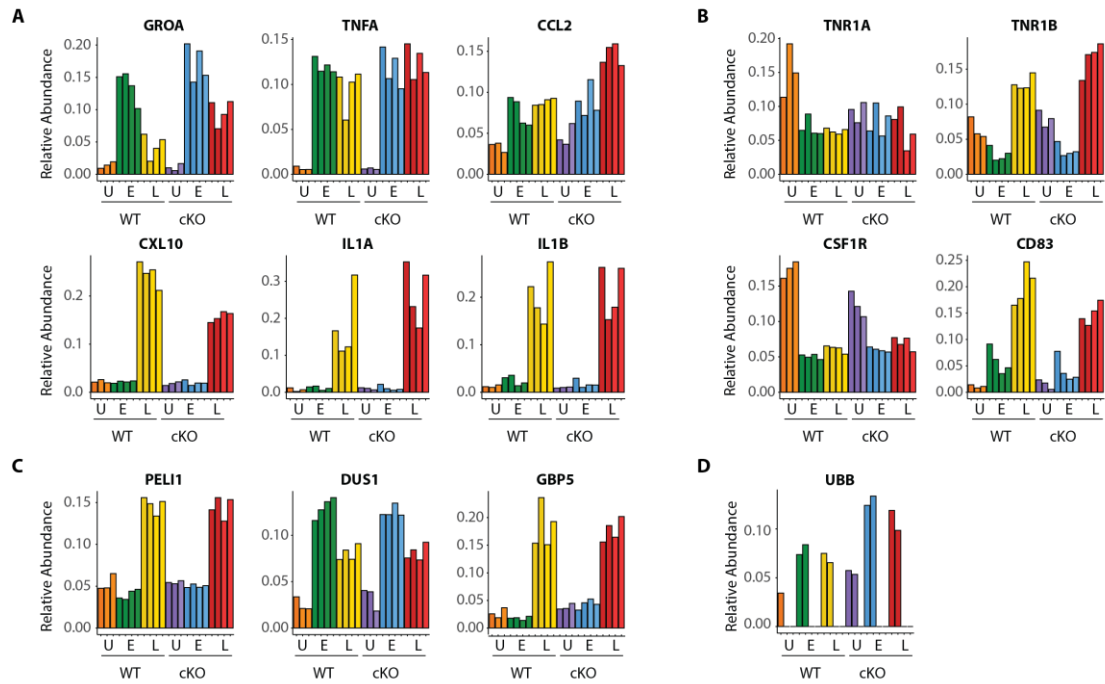

(A-D) Bar graphs showing quantitative changes for representative pro-inflammatory cytokines and chemokines (A), cell surface receptors (B), components of innate immune signaling (C) and linear ubiquitin chains as represented by UBB (D).

1068

**Supplemental Figure 4. Extended analysis of proteomic changes in the autophagy pathway.**

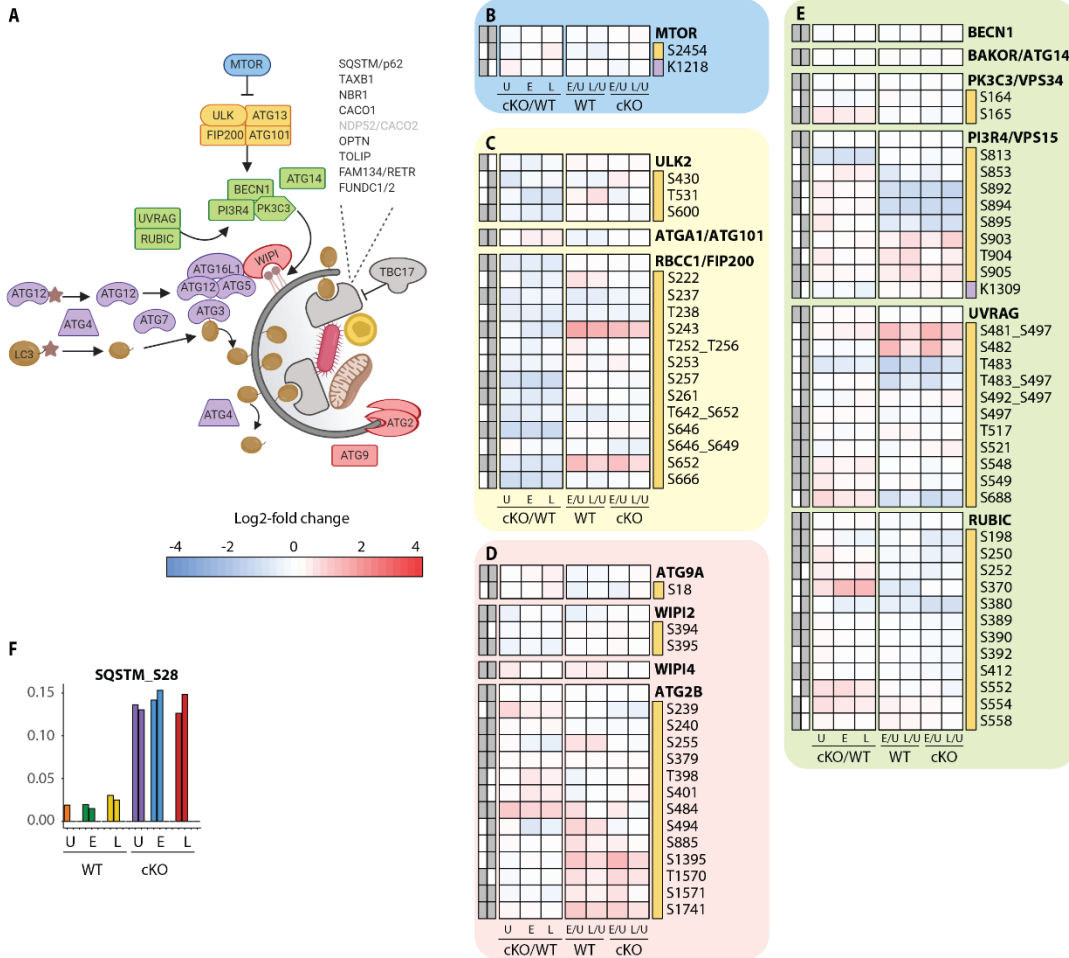

(A) Schematic representation of macro-autophagy & selective autophagy machinery as shown in Figure 3C. (B-E) Heatmap representations of mTOR (B), ULK complex (C), membrane recruitment and closure (D), and PIK3C3/Vps34 complexes (E) are shown. The background shading for each panel corresponds to the functional color coding of proteins in the pathway schematic shown in (A). (F) Bar graph showing phosphorylation on autophagy receptor p62 (SQSTM\_S28).

**Supplemental Figure 5. Characterization of proteomic changes in inflammatory signaling nodes.**

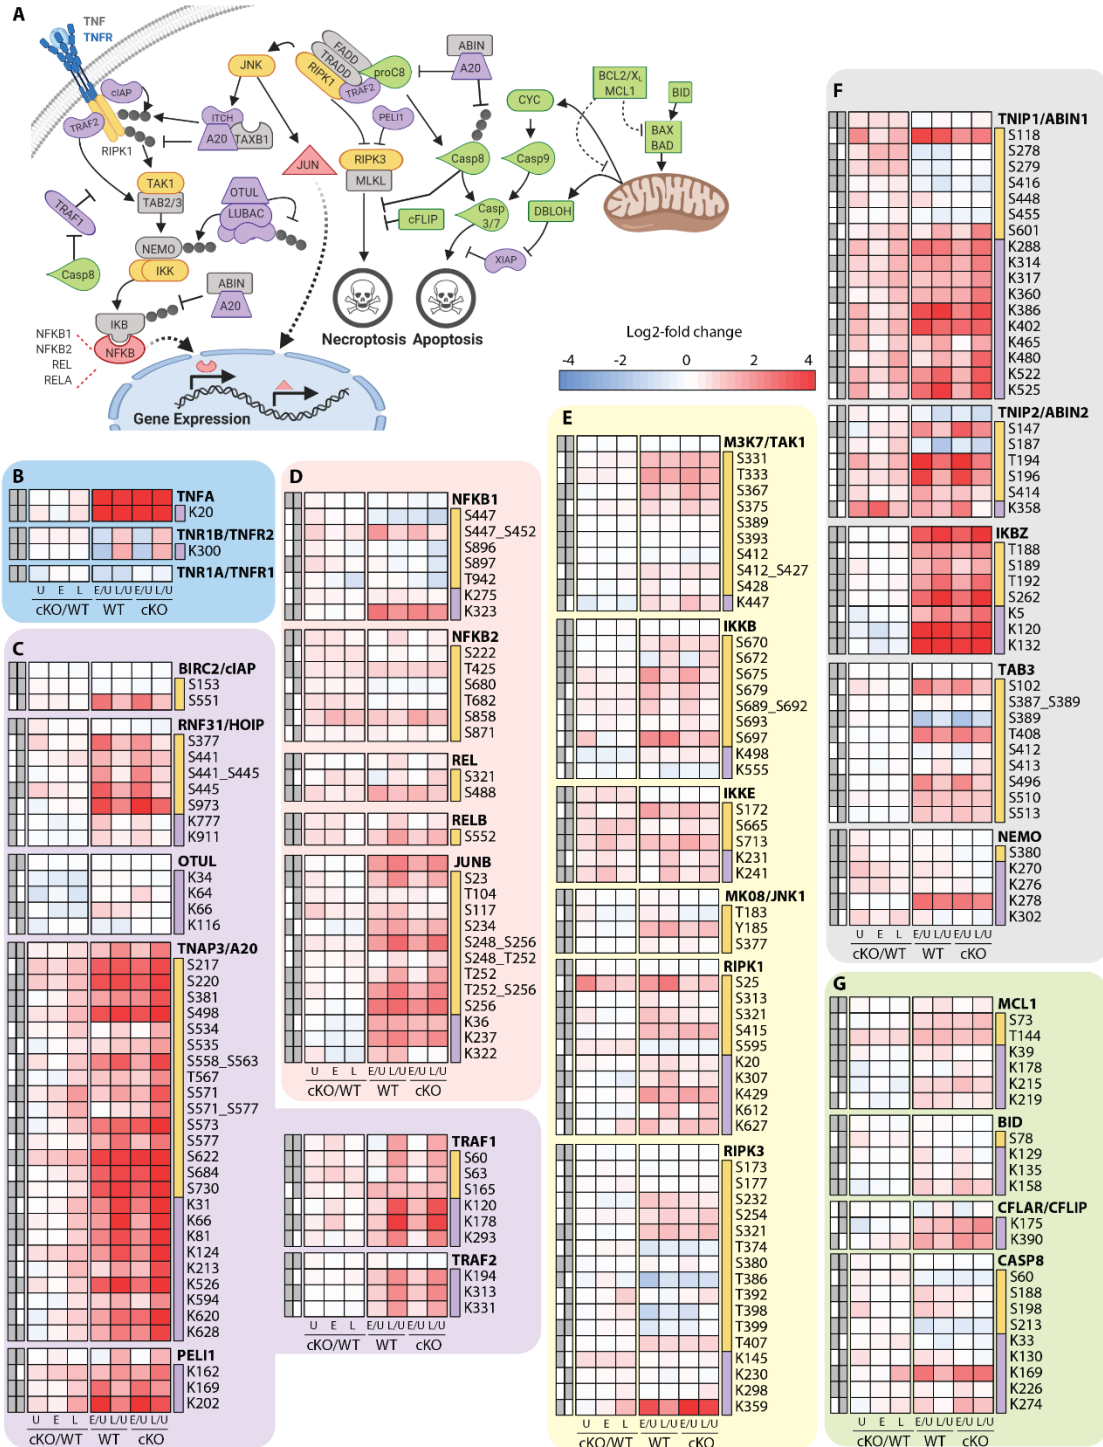

(A) Schematic representation of key components in the inflammatory signaling and programmed cell death pathways analyzed in this study. (B-G) Heatmap representations of TNF and its receptors (B), E3 ubiquitin ligase and deubiquitinase enzymes (C) and transcription factors (C), kinases (E), signaling adaptors (F), and apoptosis regulatory proteins (G). The background shading for each panel corresponds to the functional color coding of proteins in the pathway schematic shown in (A).

1070

1071

**Supplemental Figure 6. Analysis of proteomic changes in innate sensing and the interferon response.**

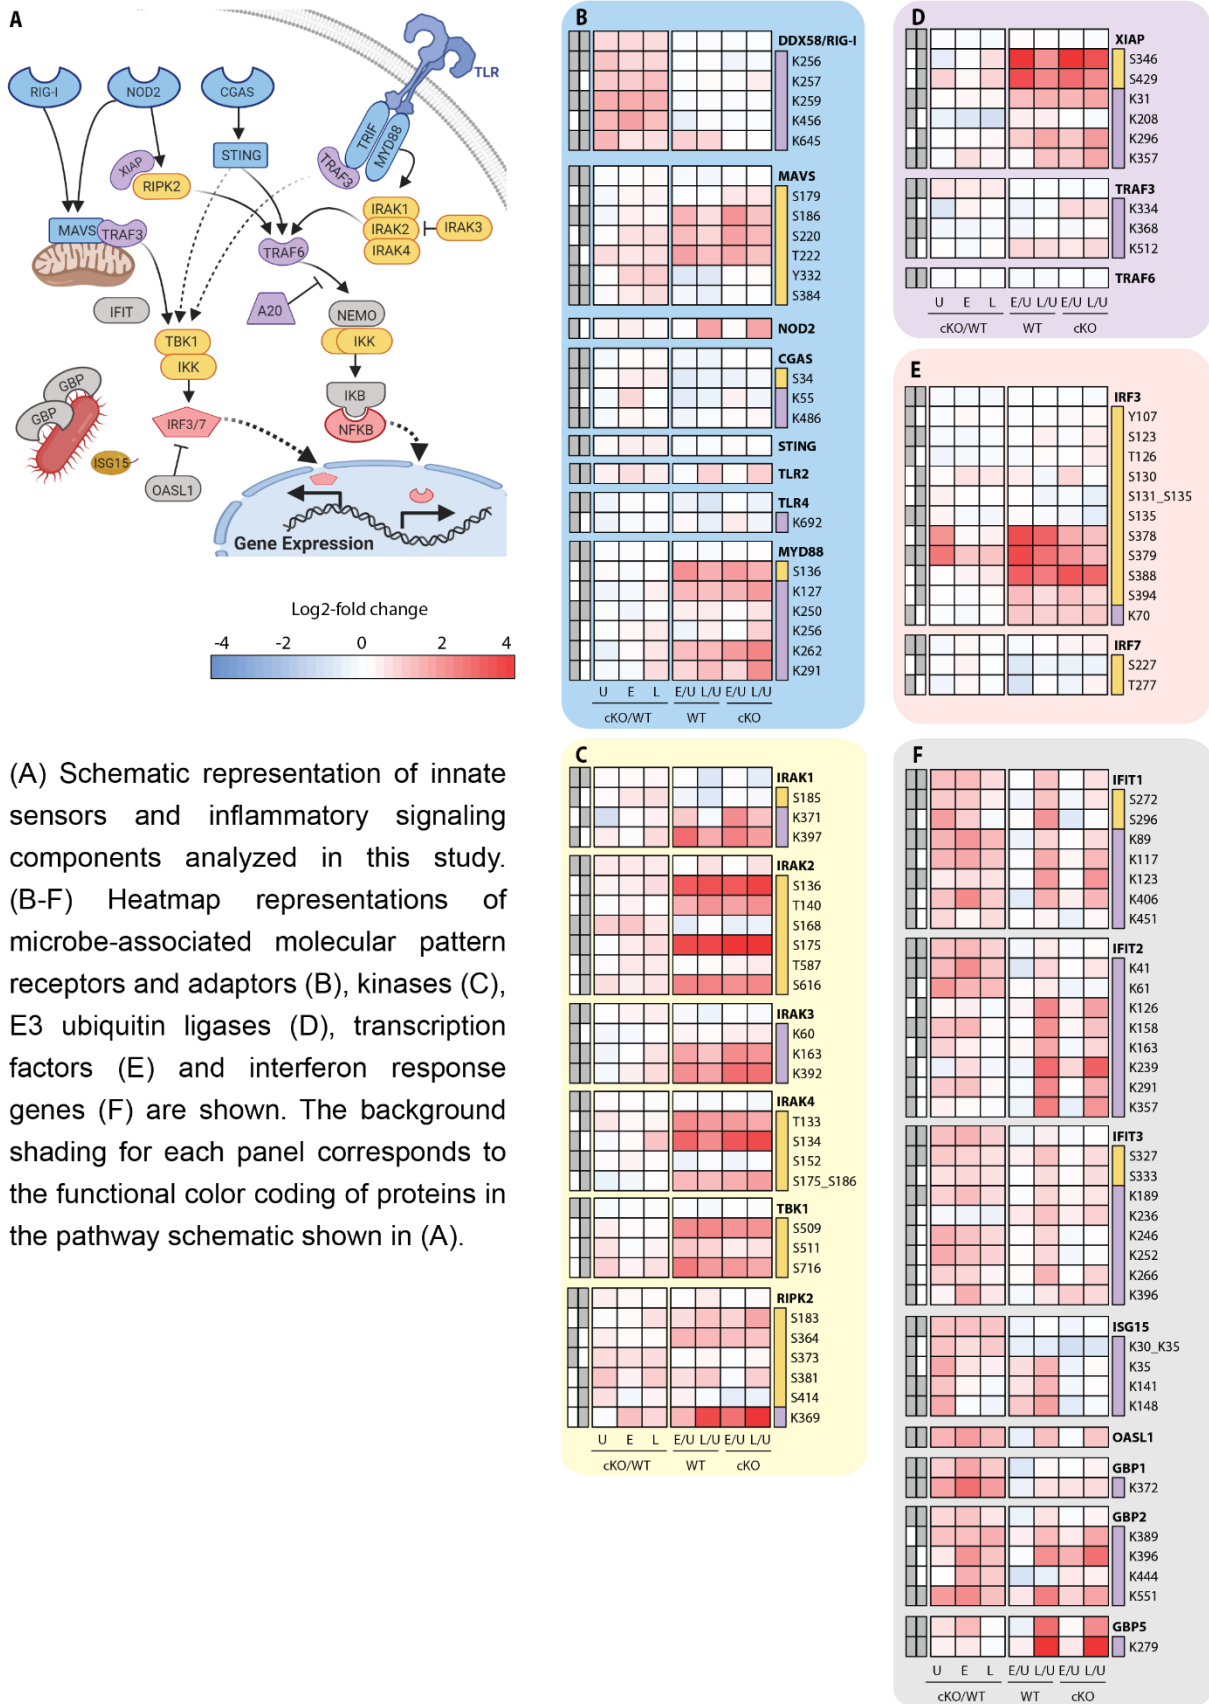



**Supplemental Figure 7. Elevated oxidative stress in ATG16L1-deficient macrophages.**

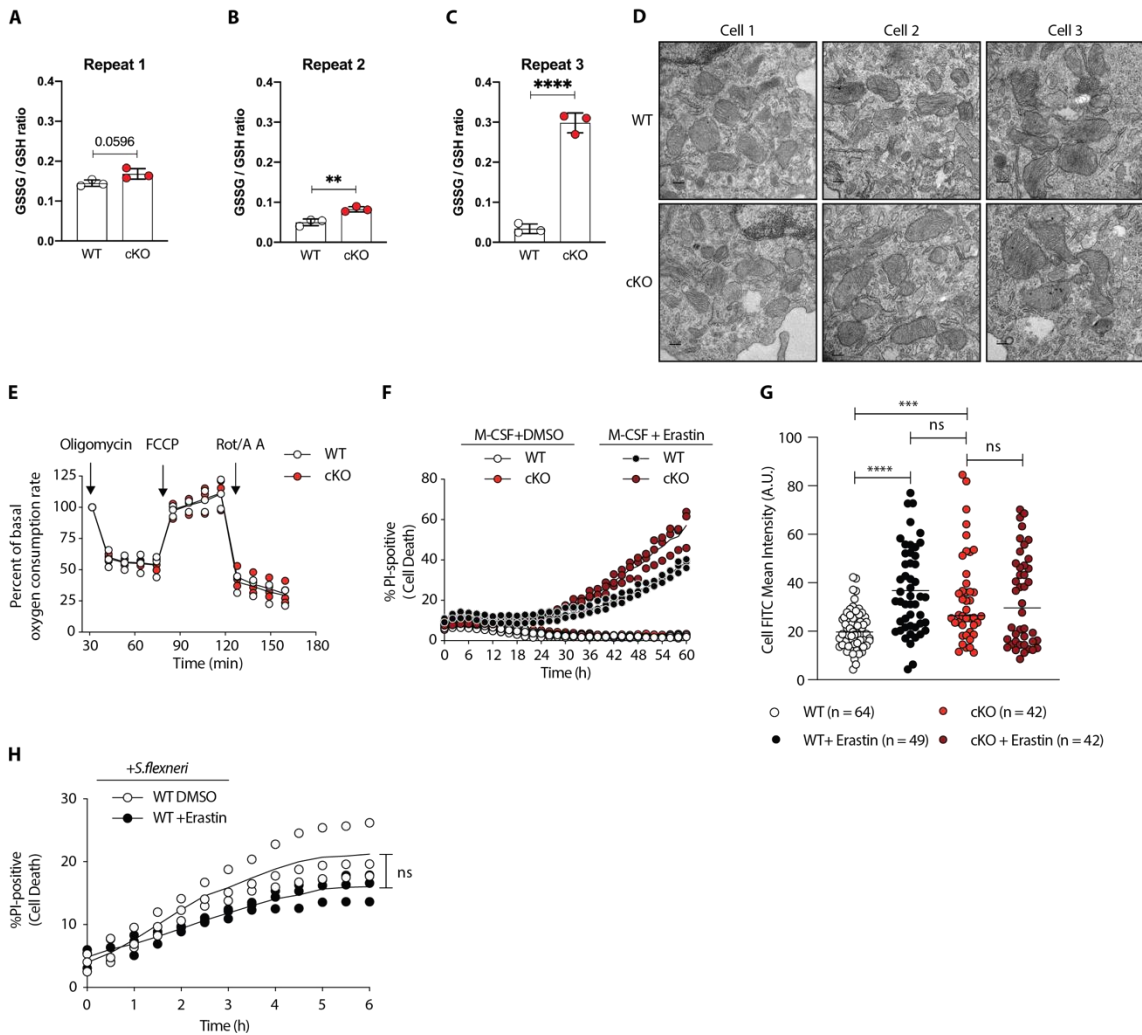

(A-C) Graphs show three independent experiments quantifying the GSSG/GSH ratio in BMDMs from three different preparations. Unpaired t test \*\* P = 0.0057, \*\*\*\* P < 0.0001. (D) Representative electron microscopy (EM) micrographs of WT and cKO BMDMs at magnification 8000x (scale bar = 0.2  $\mu$ m). (E) Seahorse assay showing oxygen consumption rate of WT and cKO BMDMs. Graph shows the percent of basal respiration following treatment with 1.5  $\mu$ M oligomycin, 1  $\mu$ M FCCP and 0.5  $\mu$ M Rotenone/Antimycin A from three independent experiments using three different BMDM preparations (n = 3). (F) Percentage of PI-positive WT and cKO BMDMs during time-course incubation with DMSO or 4  $\mu$ g/ml Erastin. A representative graph shows individual values from three wells from one experiment (n = 3). (G) Quantification of CellFITC green probe mean intensity in WT and cKO BMDMs in the absence or presence of Erastin 4  $\mu$ g/ml for 24h. Graph shows single cell data from one experiment (n = 3). Ordinary one-way ANOVA Tukey's multiple comparison test \*\*\*\* P < 0.0001 and \*\*\* P = 0.0003. A part of the data is also used in Figure 4E. (H) Percentage of PI-positive WT BMDMs during time-course infection with *S. flexneri* M90T in the presence of DMSO or Erastin 4  $\mu$ g/ml. Graph represents individual values from three independent experiments using three different BMDM preparations. ns, non-significant.

1073

1074 **Supplemental Table 1. Composition PTM-Site and Global Protein clusters**  
1075 **displayed in Figure 1F, 1G and S1b, S1C.**

1076

1077 **Supplemental Table 2. Curated list of PTMs described in Figure 3 and S3 with**  
1078 **associated references.**

1079

1080 **Supplemental Table 3. Curated list of PTMs described in Figure 4 and S4 with**  
1081 **associated references.**

1082

1083 **Supplemental Table 4. Gene Set Enrichment Analysis (GSEA) performed to**  
1084 **identify cellular processes overrepresented in ATG16L1 deficient BMDMs in**  
1085 **Figure 5A.**

1086

1087 **Supplemental Table 5. Protein references and gene names associated with**  
1088 **mitochondrial and peroxisomal categories in Figure S5A-C.**

1089

1090 **Supplemental Table 6. MSstatsTMT normalized quantification report for Global**  
1091 **Proteins data.**

1092

1093 **Supplemental Table 7. MSstatsTMT statistical testing results for Global**  
1094 **Proteins data.**

1095

1096 **Supplemental Table 8. MSstatsTMT normalized quantification report for**  
1097 **Phosphorylation Site data.**

1098

1099 **Supplemental Table 9. MSstatsTMT normalized quantification report for KGG**  
1100 **(Ub)-sites data.**
